# Supplementary material for: Globally correlated conformational entropy underlies positive and negative cooperativity in a kinase’s enzymatic cycle
Source: PubMed Central journal article supplement (PMC6379427; doi:10.1038/s41467-019-08655-7), 2019-02-18
Supplement: 41467_2019_8655_MOESM1_ESM.pdf [file 41467_2019_8655_MOESM1_ESM.pdf]

## ***Supporting Information***

### **Globally Correlated Conformational Entropy Underlies Positive and Negative Cooperativity in a Kinase's Enzymatic Cycle**

*Yingjie Wang,<sup>1,2#</sup> Manu V.S.,<sup>2#</sup> Jonggul Kim<sup>1,2#†</sup>, Geoffrey Li,<sup>1‡</sup> Lalima G. Ahuja,<sup>3</sup> Philip Aoto,<sup>3</sup>  
Susan S. Taylor,<sup>3</sup> and Gianluigi Veglia<sup>1,2\*</sup>*

*<sup>1</sup>Department of Chemistry and <sup>2</sup>Biochemistry, Molecular Biology, and Biophysics, University of Minnesota, Minneapolis, MN 55455*

*<sup>3</sup>Department of Chemistry and Biochemistry, and Pharmacology University of California at San Diego, La Jolla, CA 92093*

# These authors contributed equally to the manuscript

† Present address: Department of Biophysics and Howard Hughes Medical Institute, University of Texas Southwestern Medical Center, Dallas, TX 75390, USA.

‡ Present address: Department of Biochemistry, Vanderbilt University School of Medicine, Nashville, Tennessee 37240, United States.

**\*Corresponding Author**

G.V. (e-mail: [vegli001@umn.edu](mailto:vegli001@umn.edu))

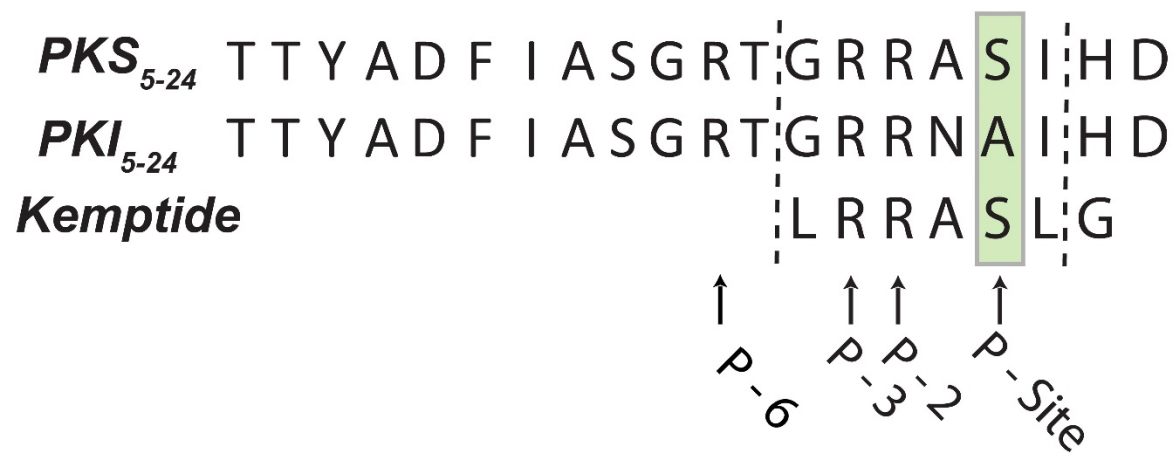

**Supplementary Figure 1:** Primary sequences of PKS<sub>5-24</sub>, PKI<sub>5-24</sub>, and the recognition sequence Kemptide.

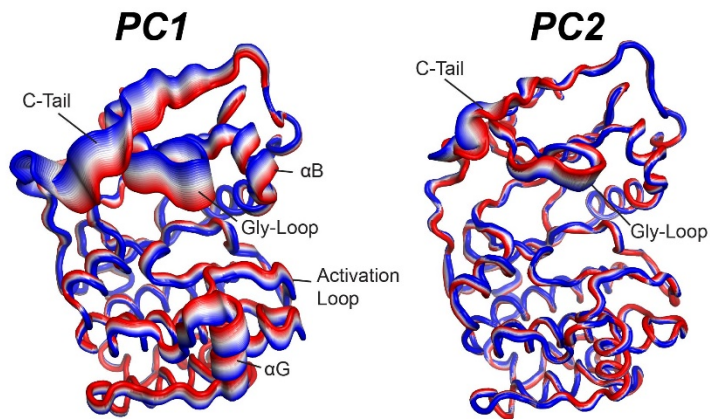

**Supplementary Figure 2:** Principal Components for the major conformational states as identified by the X-ray structures along the enzymatic pathway, and the color codes correspond to the projection along the principle components in Fig. 1, where the red and blue colors indicate the minimum and maximum values, respectively.

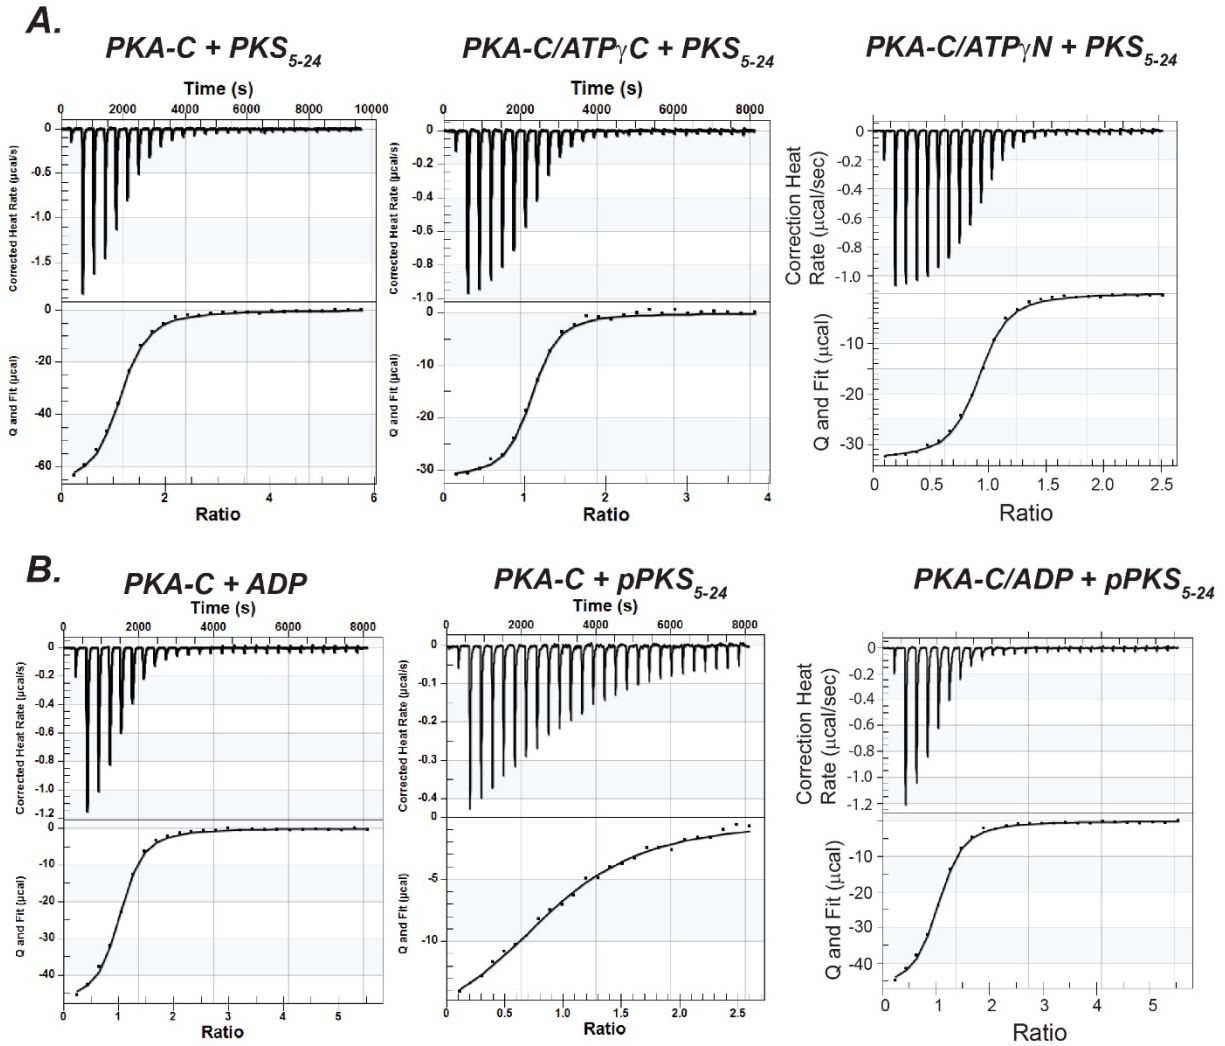

**Supplementary Figure 3:**

**A.** ITC isotherms of PKS<sub>5-24</sub> binding to Apo, ATP<sub>γ</sub>C and ATP<sub>γ</sub>N saturated PKA-C. **B.** ITC isotherm of ADP and pPKS<sub>5-24</sub> binding to Apo PKA-C, as well as ITC isotherms of pPKS<sub>5-24</sub> binding to ADP saturated PKA-C

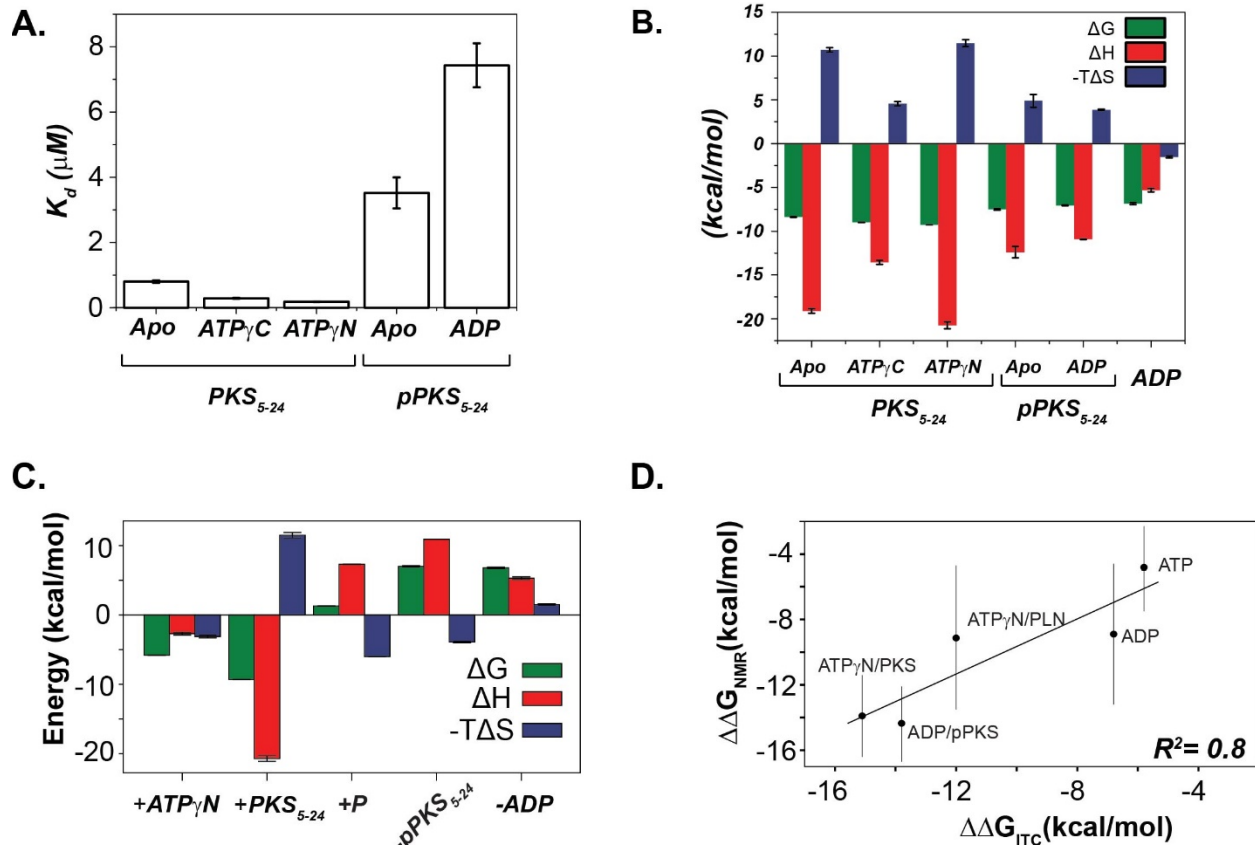

**Supplementary Figure 4:** Summary of the thermodynamics of  $\text{PKS}_{5-24}$ ,  $\text{pPKS}_{5-24}$  and ADP binding to PKA-C. **A.** Binding affinity of  $\text{PKS}_{5-24}$ ,  $\text{pPKS}_{5-24}$  to apo and nucleotide-saturated PKA-C ( $n=3$ ). **B.** Thermodynamics of  $\text{PKS}_{5-24}$ ,  $\text{pPKS}_{5-24}$  and ADP binding to different forms of PKA-C. **C.** Thermodynamics of each step over the catalytic cycle. **D.** Linear correlation of Changes in the free energy of binding ( $\Delta\Delta\text{G}$ ) obtained from the CONCISE analysis against the  $\Delta\Delta\text{G}$  determined by isothermal titration calorimetric (ITC) measurements (mean  $\pm$  SD,  $n=3$ ), with  $R^2 = 0.8$ . The CONCISE data are obtained from probability density distributions of the NMR chemical shifts for the ILV methyl groups of PKA-C, where the error bar reports the 90% confidence interval.

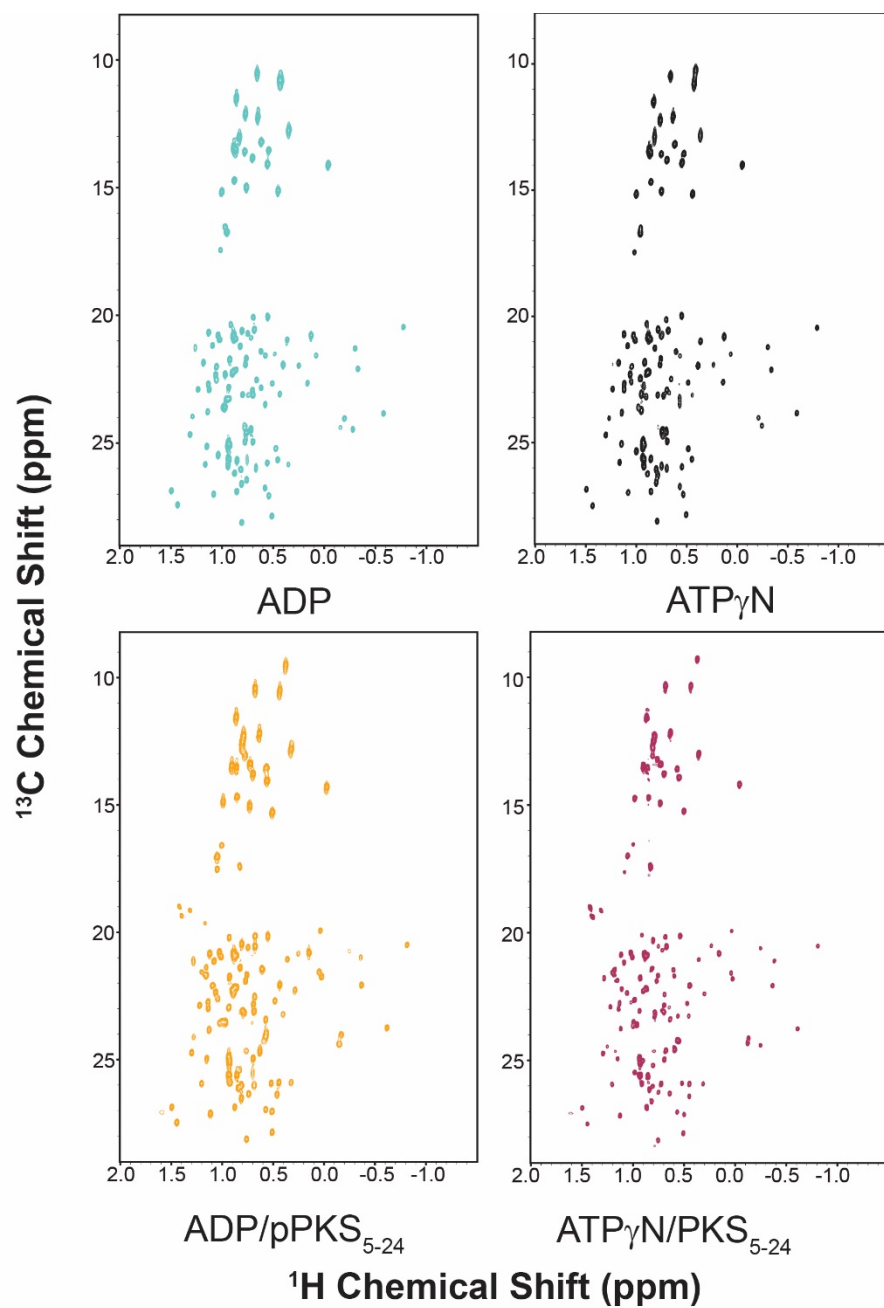

**Supplementary Figure 5:**  $^1\text{H}$ - $^{13}\text{C}$  methyl-TROSY spectra of ligand bound forms of PKA-C; PKA-C/ADP (Turquoise), PKA-C/ $\text{ATP}_{\gamma\text{N}}$ /60mM  $\text{Mg}^{2+}$  (black), PKA-C/ADP/pPKS<sub>5-24</sub> (orange), and PKA-C/ $\text{ATP}_{\gamma\text{N}}$ /PKS<sub>5-24</sub> (maroon).

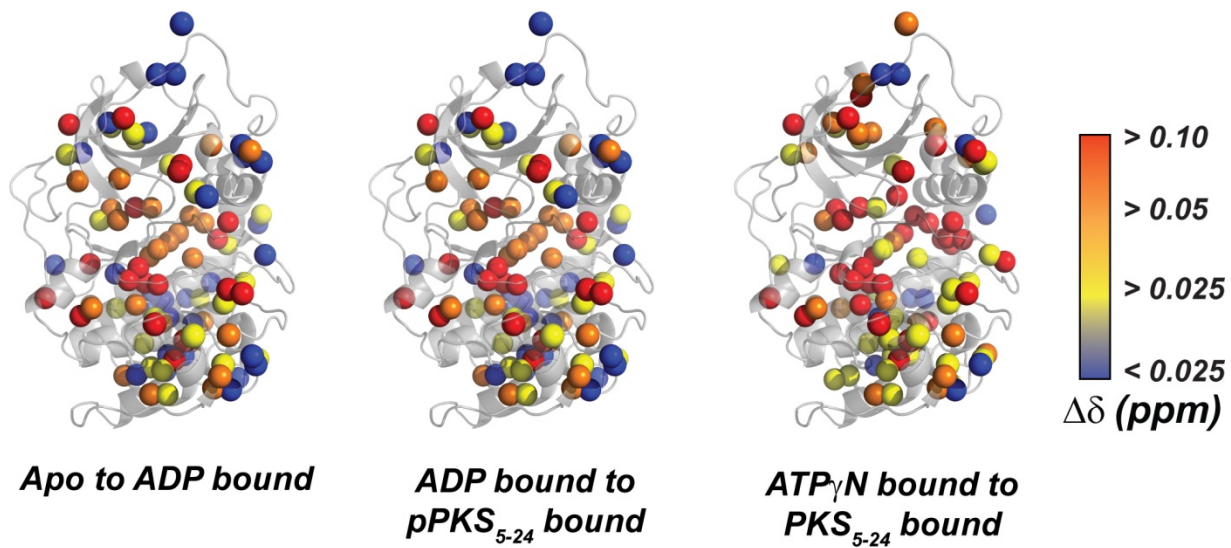

**Supplementary Figure 6:** Chemical shift perturbation upon ADP (left), pPKS<sub>5-24</sub> (middle), or PKS<sub>5-24</sub> (right) binding to PKA-C mapped onto the crystal structure of PKA-C (PDB: 1ATP).

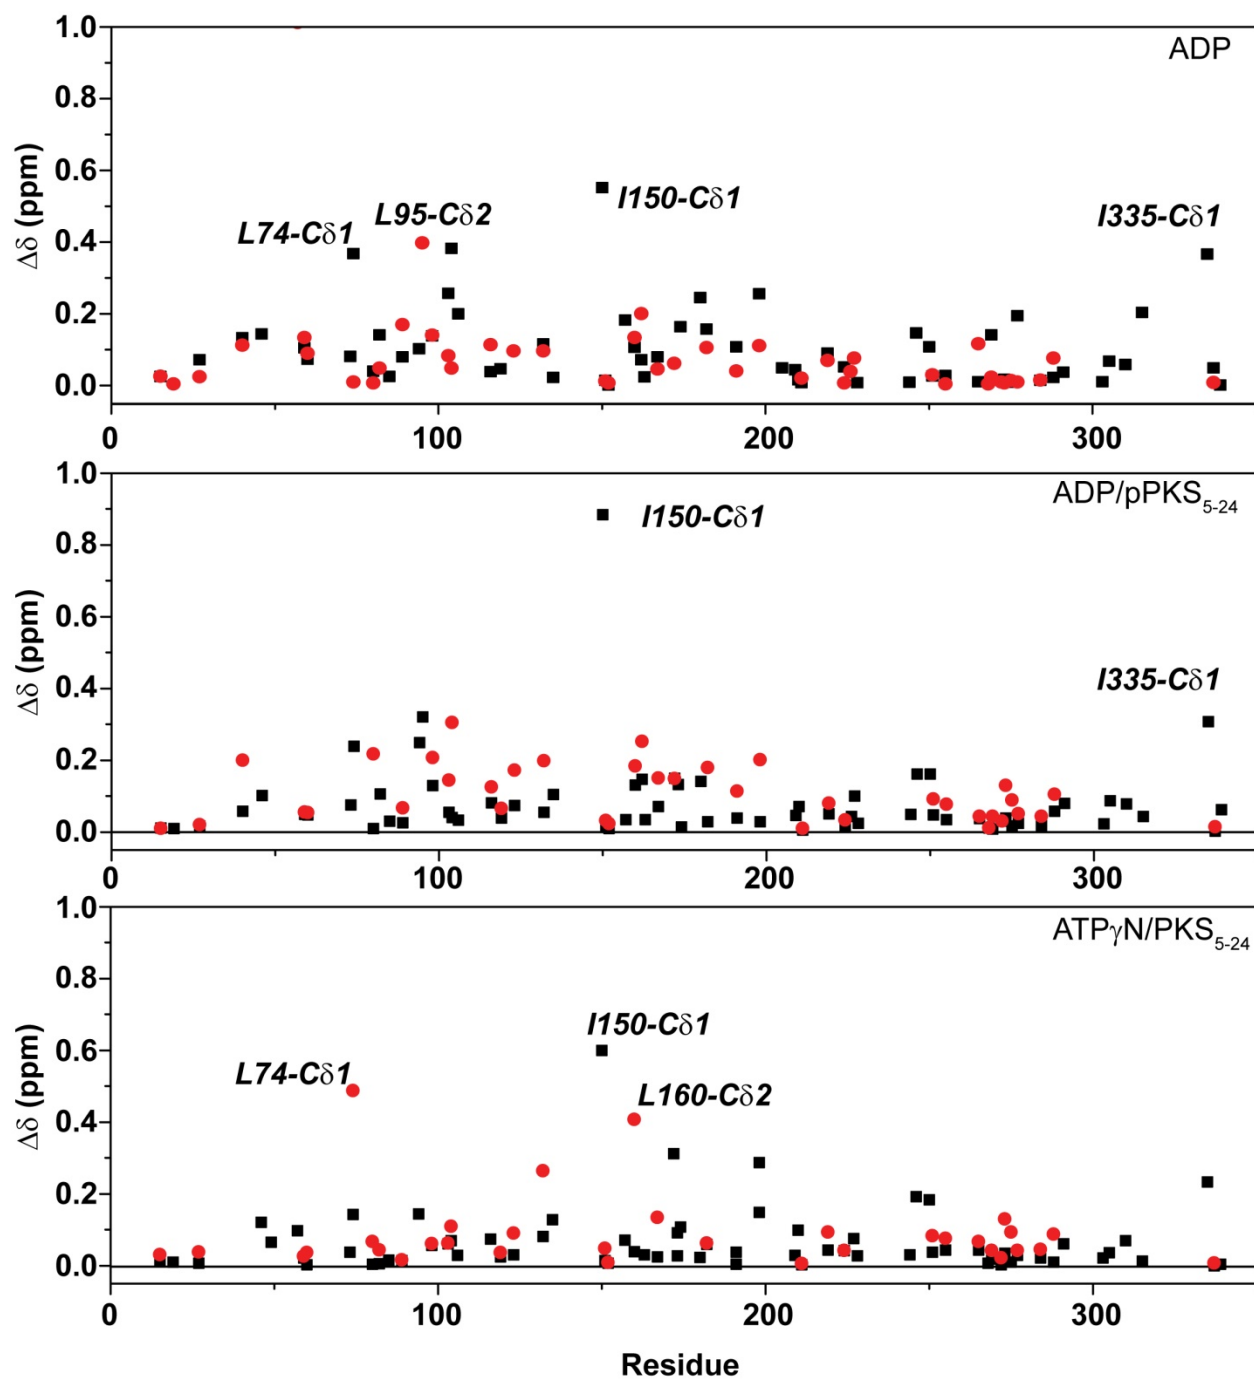

**Supplementary Figure 7:** Chemical shift perturbation of methyl groups upon binding of ADP to the apo enzyme or peptide (pPKS<sub>5-24</sub>, PKS<sub>5-24</sub>) to the nucleotide bound form of PKA-C.



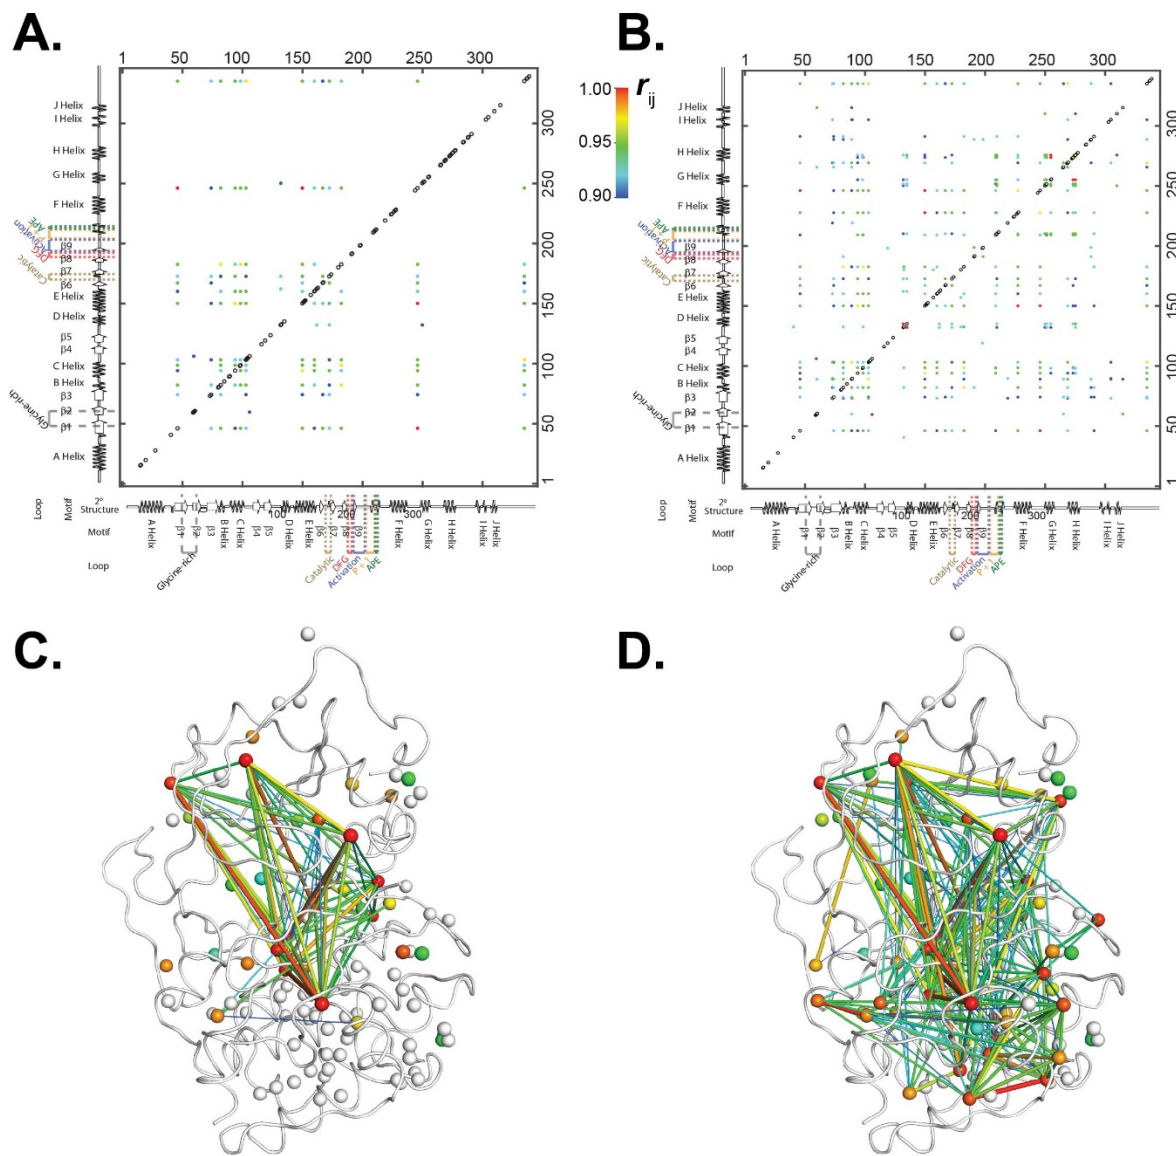

**Supplementary Figure 8:** Top: CHESCA plot showing the network of allosteric changes in PKA-C upon binding of ATP $\gamma$ N. CHESCA plots with  $r_{ij} > 0.9$  and vector distance cutoff 0.1 (A) and 0.05 (B), respectively. C and D corresponding web plots showing the highest correlated residues in the transition from apo to nucleotide-bound state.

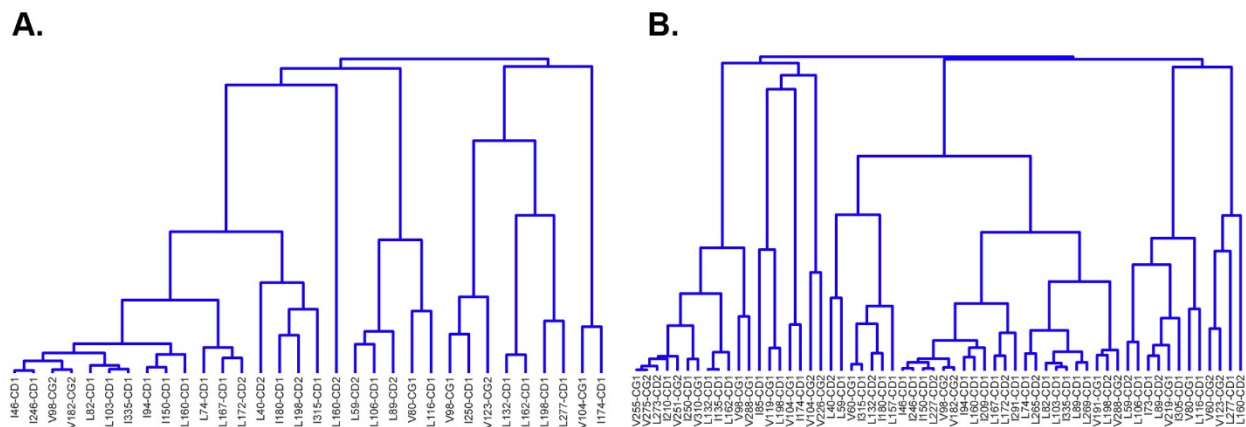

**Supplementary Figure 9:** Dendrograms from hierarchical clustering obtained from the CHESCA analysis (A) uses higher vector distance cutoff of 0.1 in the correlation matrix (Supplementary Figure 8A) and (B) uses a lower vector distance cutoff of 0.05 (Supplementary Figure 8B), describing the clustering of methyl groups chemical shifts that move through correlated linear trajectories with ADP, ATP $\gamma$ N with high Mg $^{2+}$ , ADP and pPKS $_{5-24}$ , and ATP $\gamma$ N and PKS $_{5-24}$ . Note that under different cutoffs, the majority of residues for most of the states fall under a single group, showing that the entire enzyme allosterically moves between the open and closed states except for the ADP bound state where the residues are split off into smaller groups.

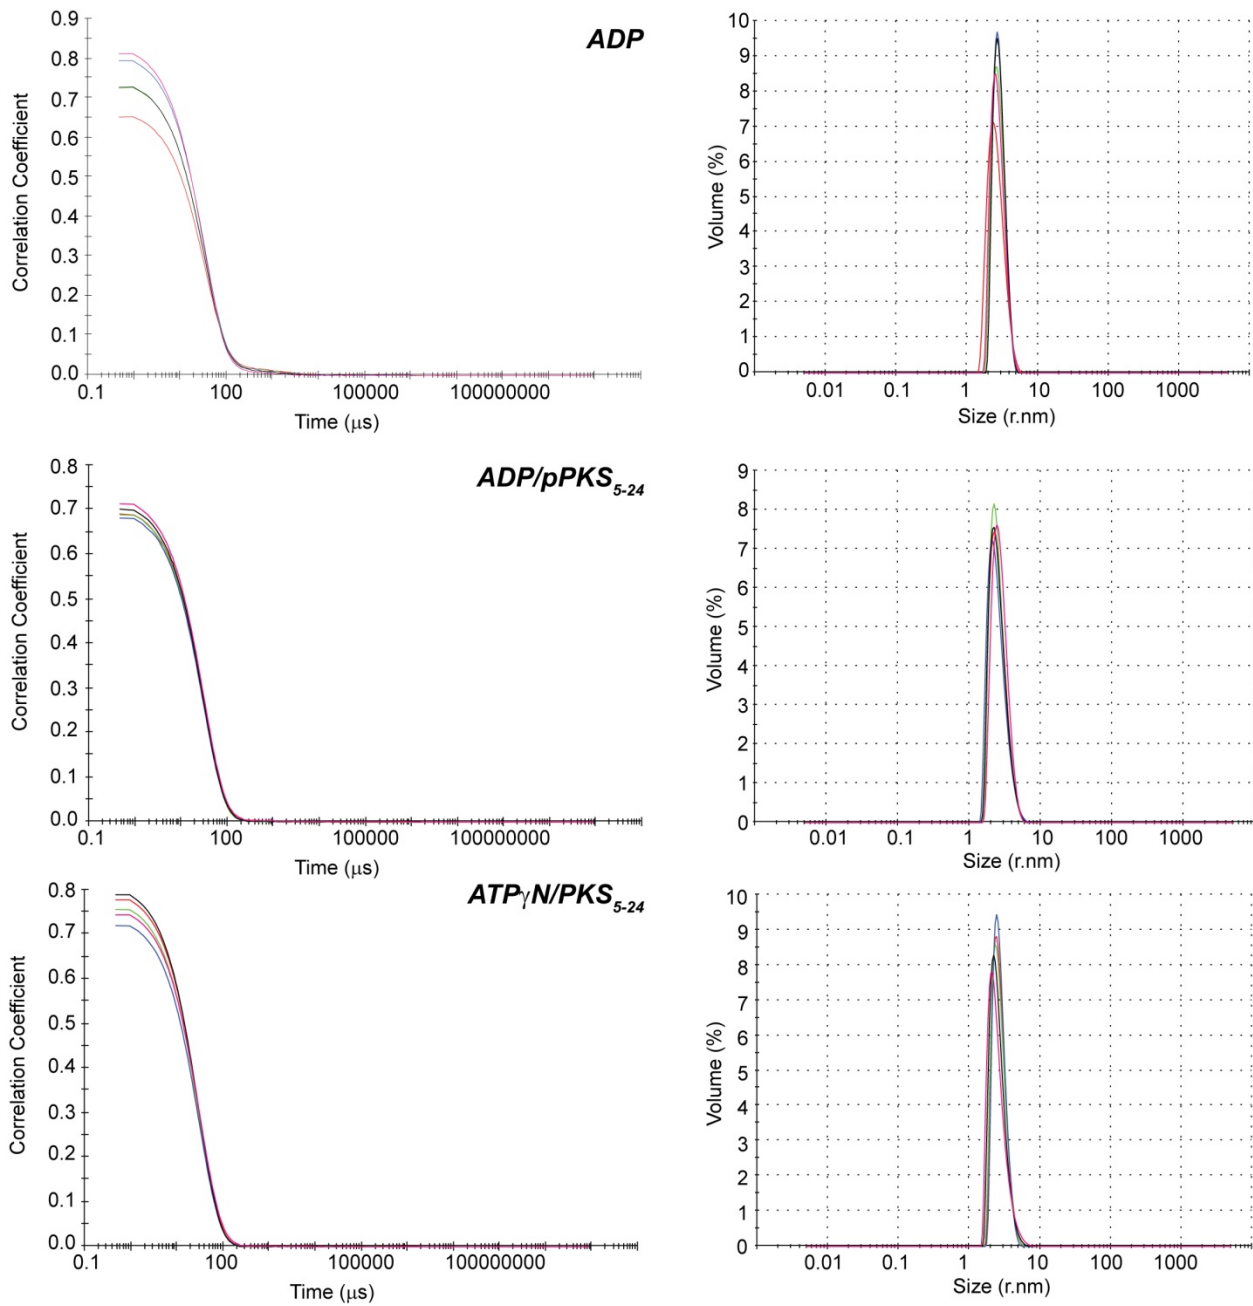

**Supplementary Figure 10:** The dynamic light scattering data for PKA-C/ADP, PKA-C/ADP/pPKS<sub>5-24</sub>.and PKA-C/ATP<sub>γ</sub>N/pPKS<sub>5-24</sub>. The raw scattering correlation plot for all runs as well as the size of the particles from the fit are shown (n=4). Data are reported in the Source Data file.

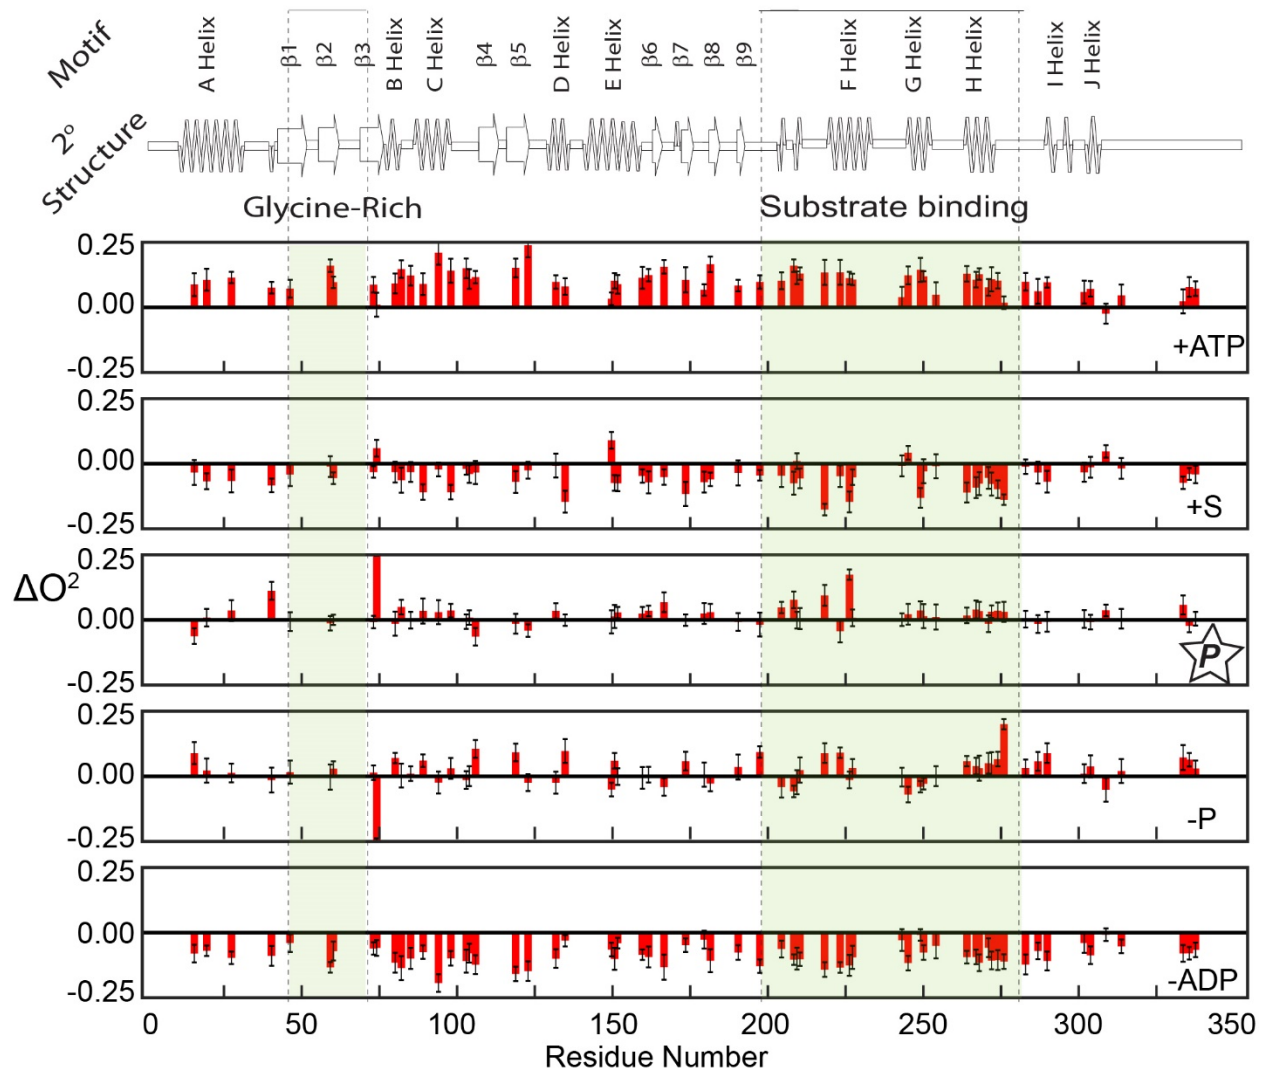

**Supplementary Figure 11:** Change of Methyl Group Order Parameters ( $\Delta O^2$ ) as a function of residue as measured by coherence violated cross-correlation spectroscopy for each step over the catalytic cycle, with an average difference in  $\Delta O^2$  of 0.10, -0.05, 0.02, 0.02, and -0.07 for each step, respectively, where the error bars are derived from the standard deviation of the fitting of the order parameters.

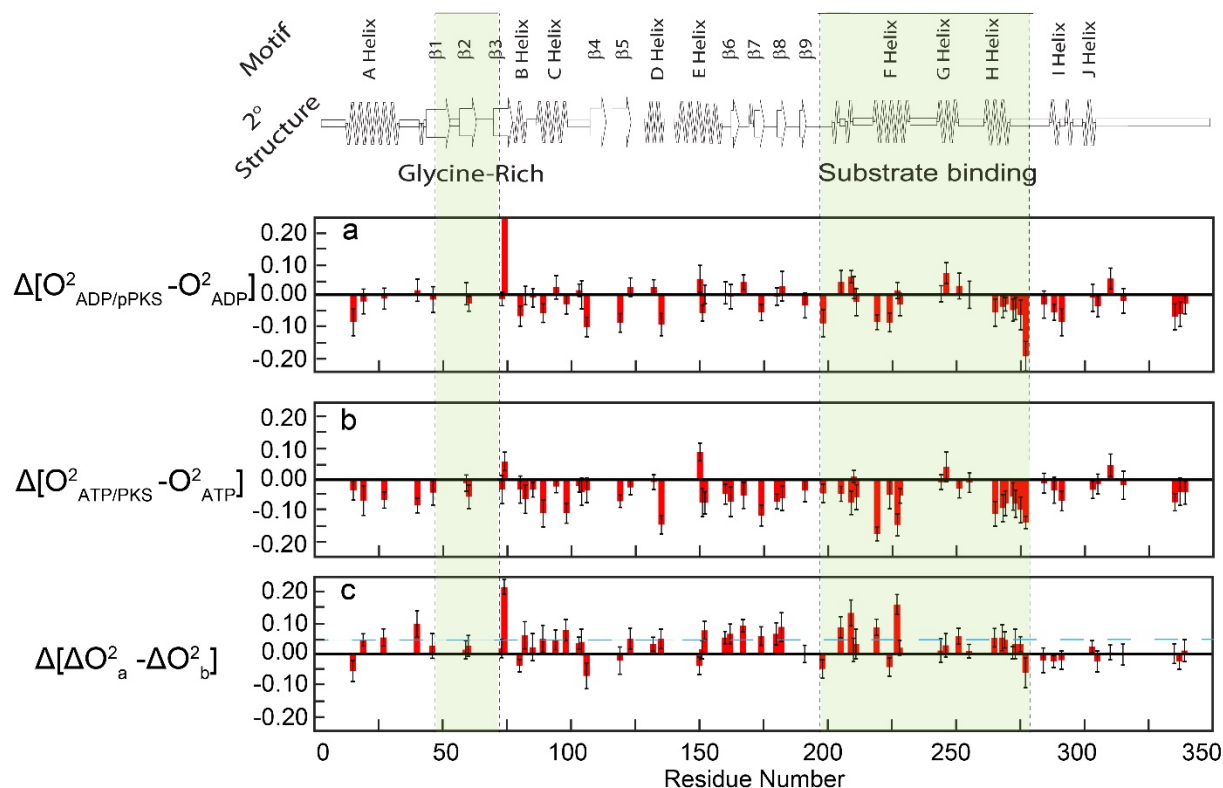

**Supplementary Figure 12: Changes in order parameters between the Michaelis-Menton and the product formation complexes along the catalytic cycle.** Panel *a* denotes the differences for the methyl group order parameters between PKA-C/ADP and PKA-C/ADP/pPKS complexes; panel *b* shows the corresponding differences between PKA-C/ATP and PKA-C/ATP/pPKS complexes. Panel *c* shows the differences in order parameters between panels *a* and *b*  $\{\Delta\Delta O^2 = \Delta[\Delta O^2_a - \Delta O^2_b]\}$ . The positive values indicate a rigidification of the methyl groups, highlighting the sign of opposite cooperativity. The dashed blue line indicates a 0.05 cutoff. The error bars are derived from the standard deviation of the fitting of the order parameters.

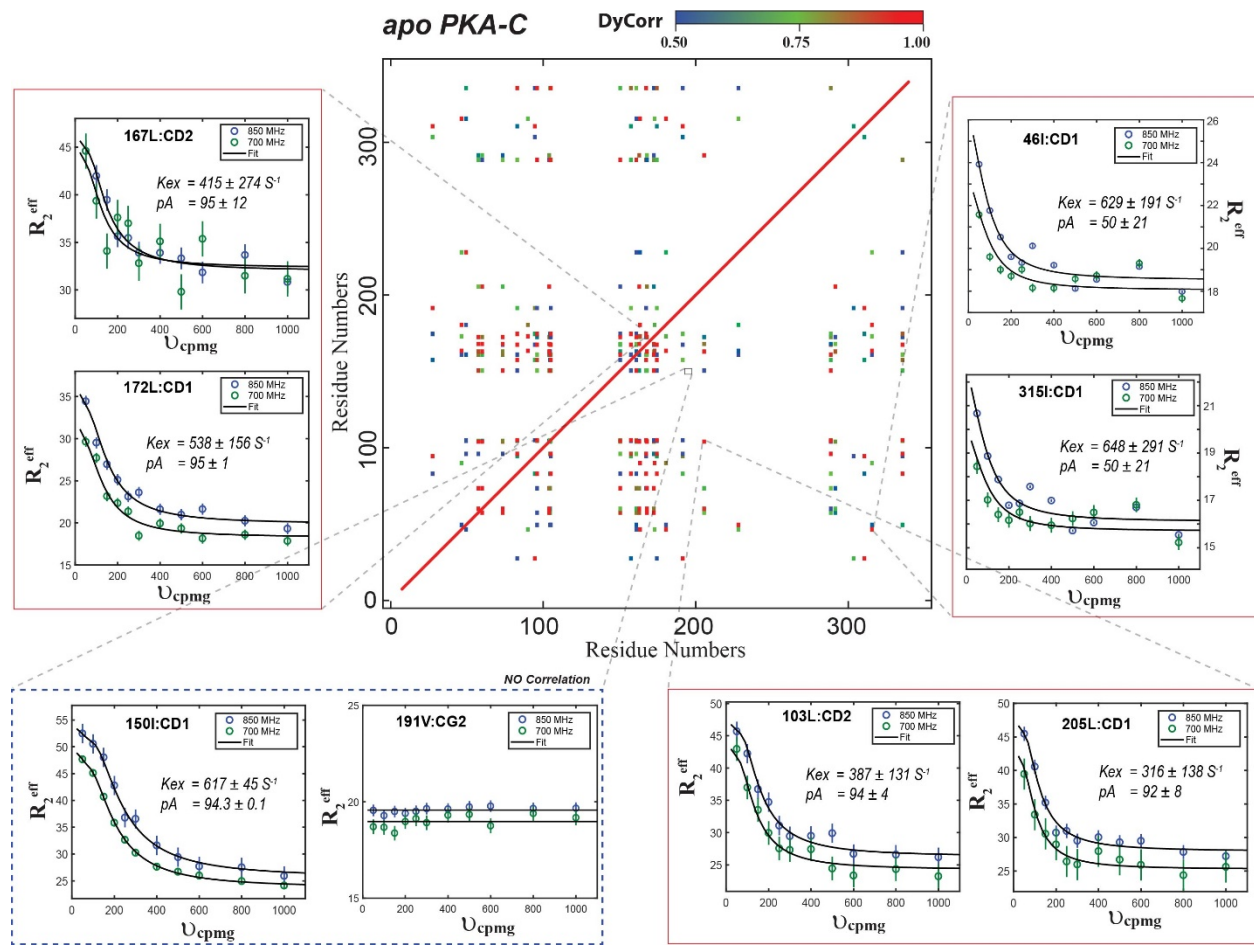

**Supplementary Figure 13:** Dynamic Correlation (DyCorr) maps of apo state of PKA-C with few representative residues showing correlated methyl dispersion profiles. The error bar in the CPMG profiles were estimated by replicates of the experiments at 50, 200 and 1000 Hz.



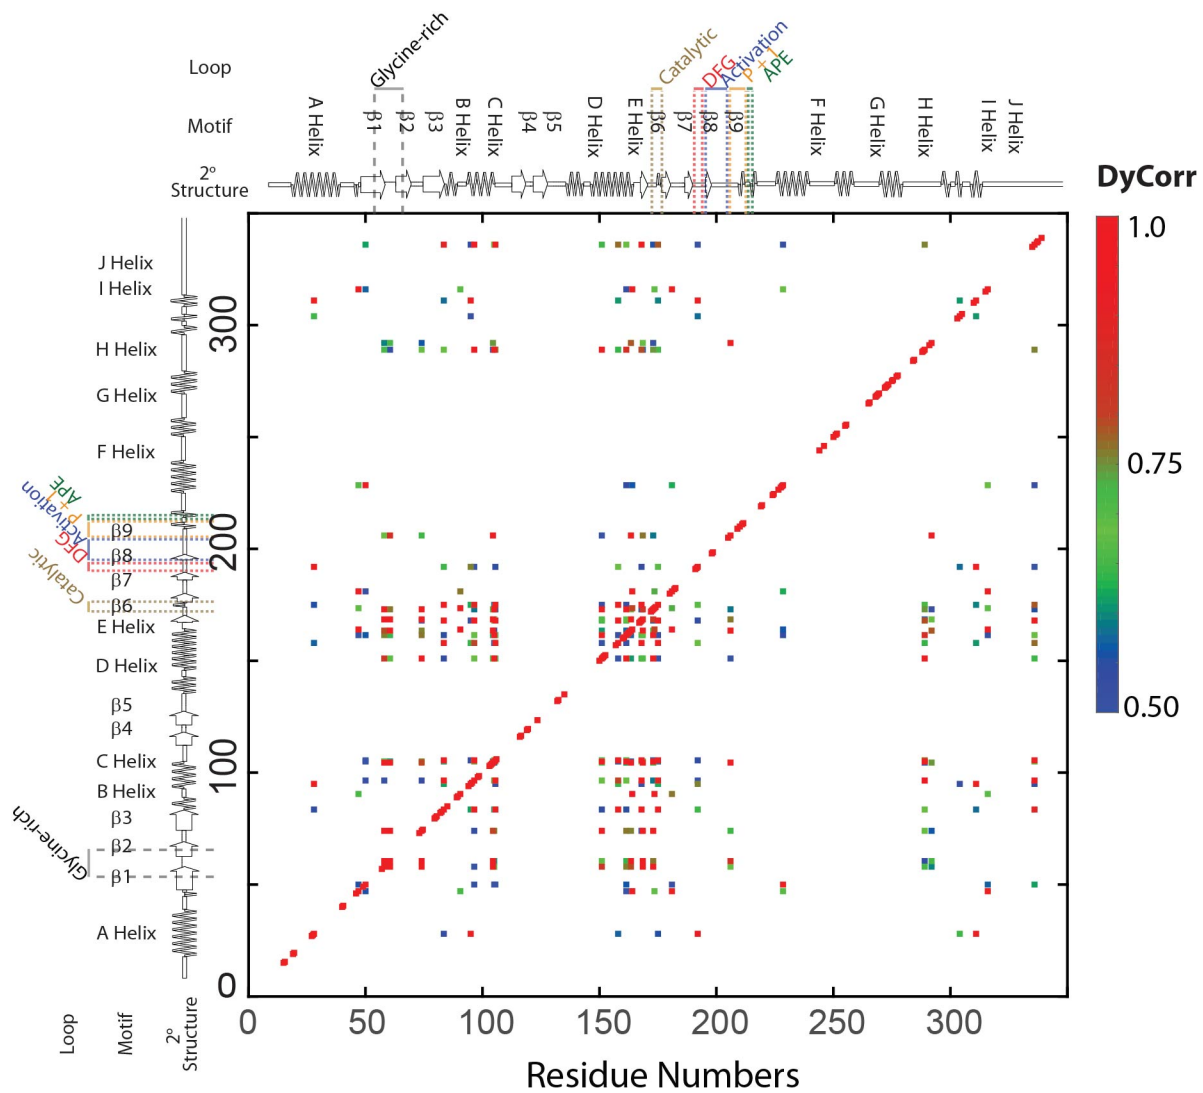

**Supplementary Figure 14:** Dynamic Correlation maps for the apo state of PKA-C, showing the dynamically uncommitted state for the methyl groups, where the diagonal dots denote the assigned residues.

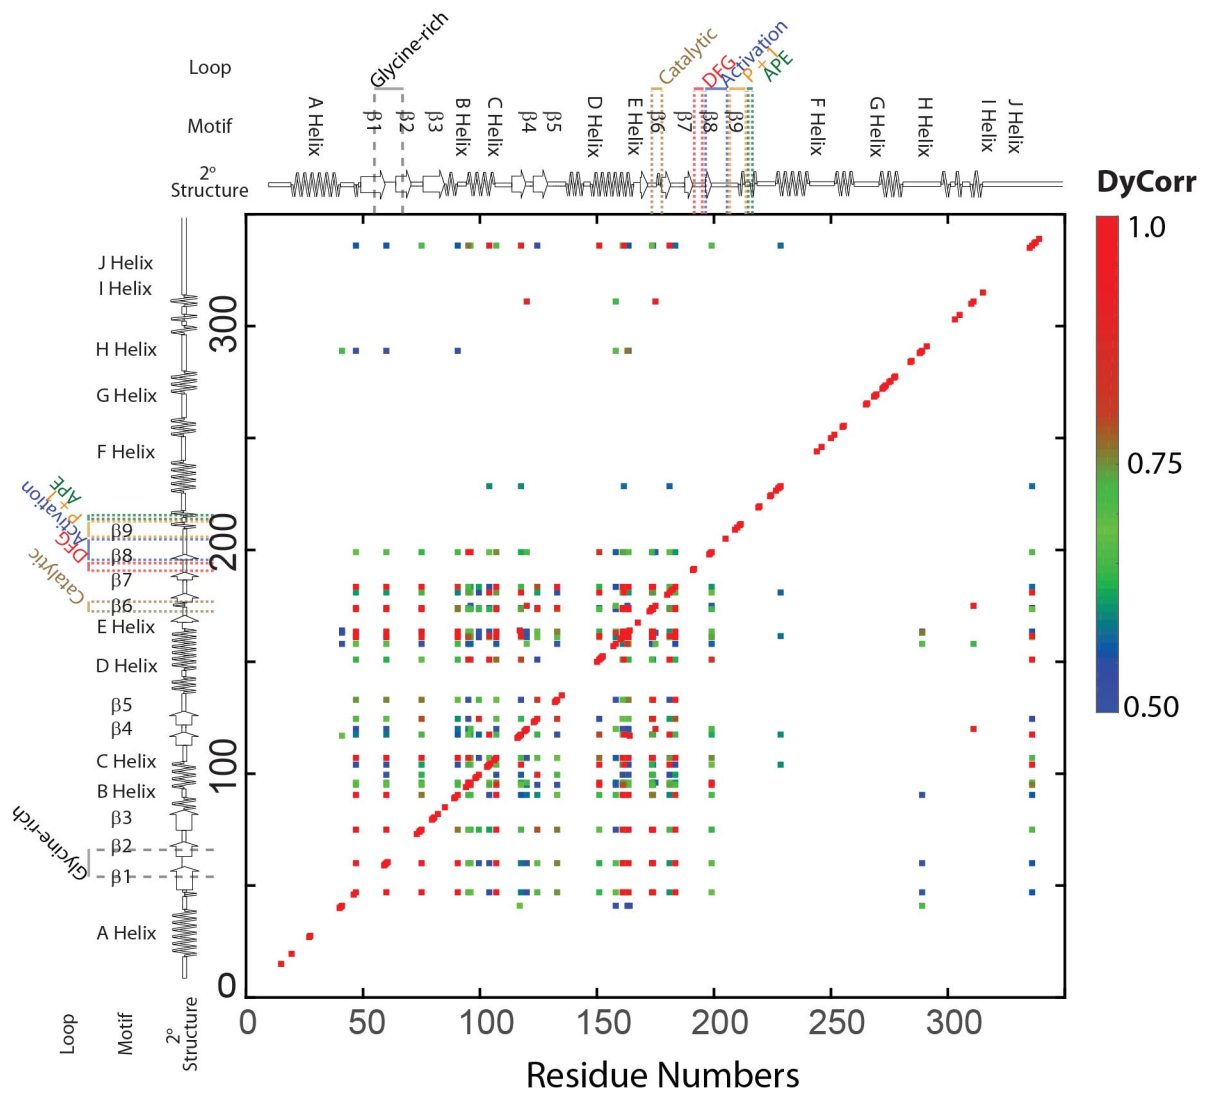

**Supplementary Figure 15:** Dynamic Correlation maps for the binary state of PKA-C/ATP $\gamma$ N showing the methyl groups that move synchronously throughout the entire kinase.



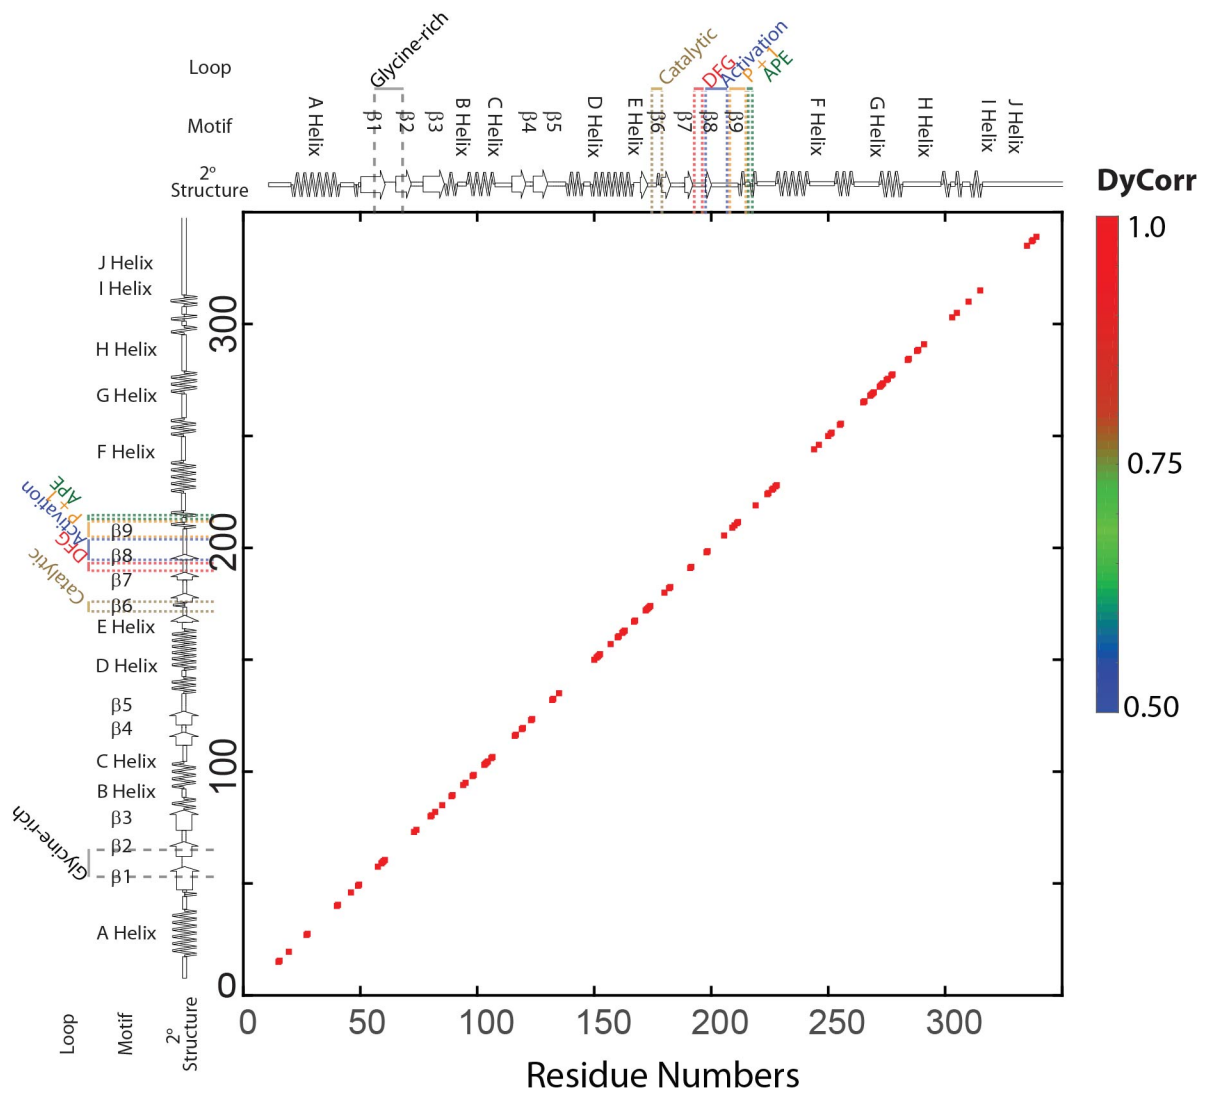

**Supplementary Figure 16:** Dynamic Correlation maps for the ternary state of PKA-C/ATP $\gamma$ N/PKS<sub>5-24</sub> showing the dynamically quenched state.

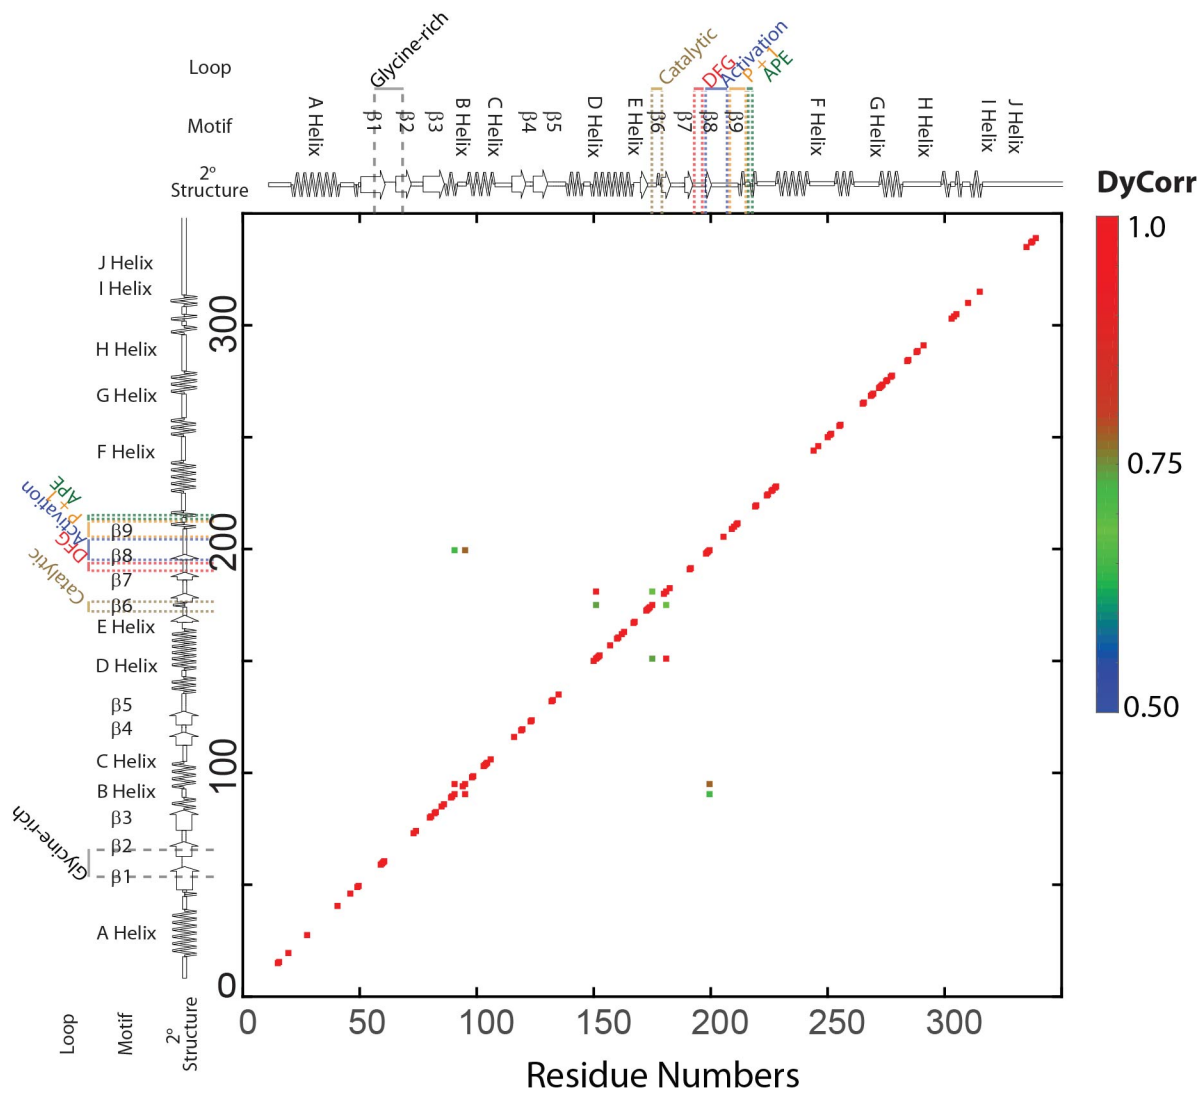

**Supplementary Figure 17** Dynamic Correlation maps for the ternary state of PKA-C/ADP/pPKS<sub>5-24</sub> showing the sparse emergence of correlated slow dynamics.

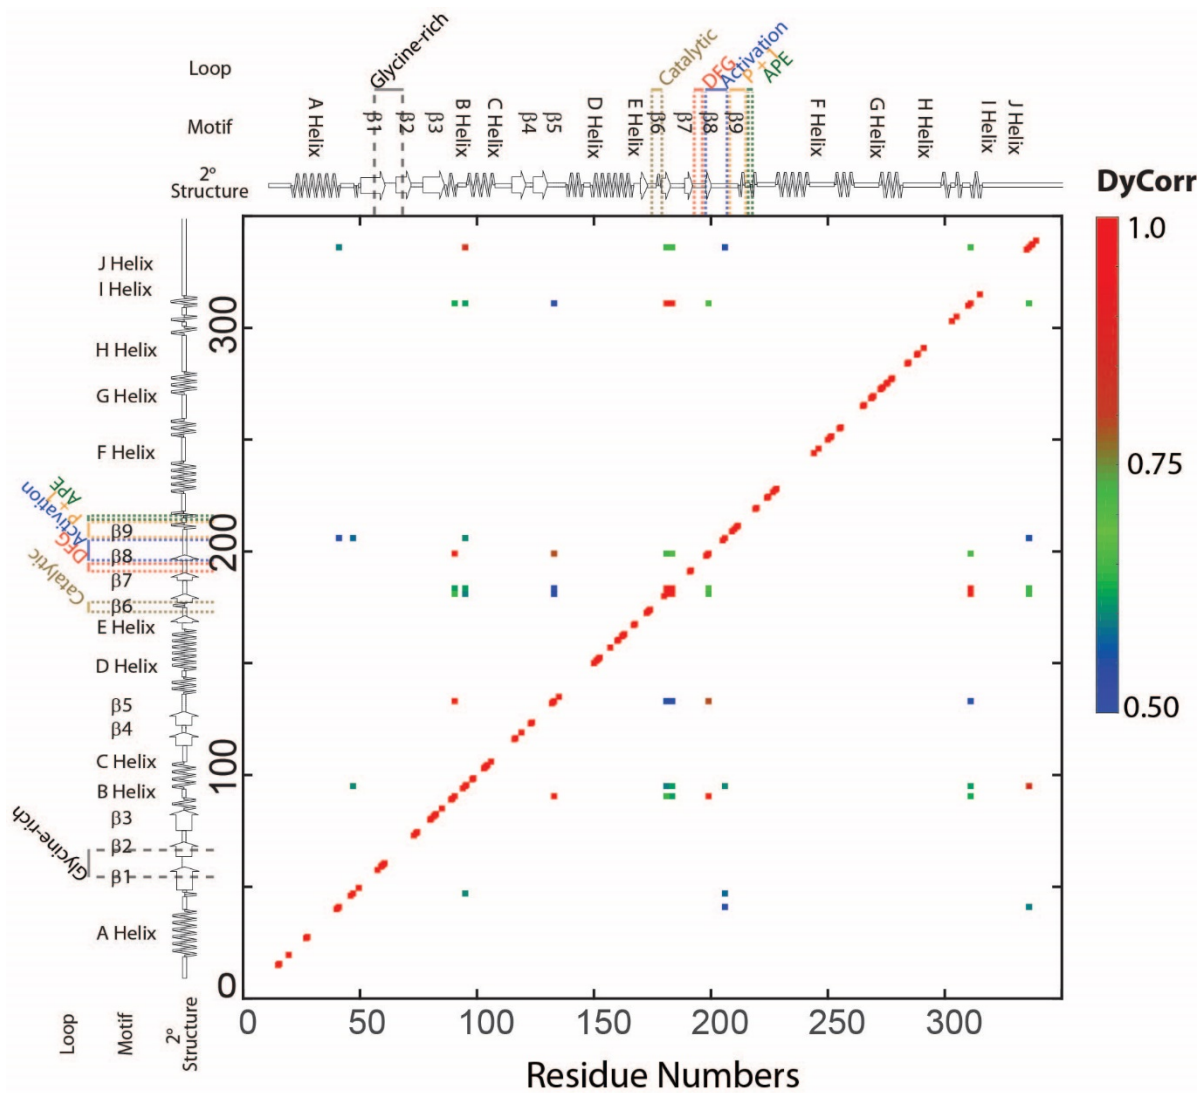

**Supplementary Figure 18** Dynamic Correlation maps for the binary state of PKA-C/ADP showing the methyl groups that move asynchronously throughout the entire kinase.

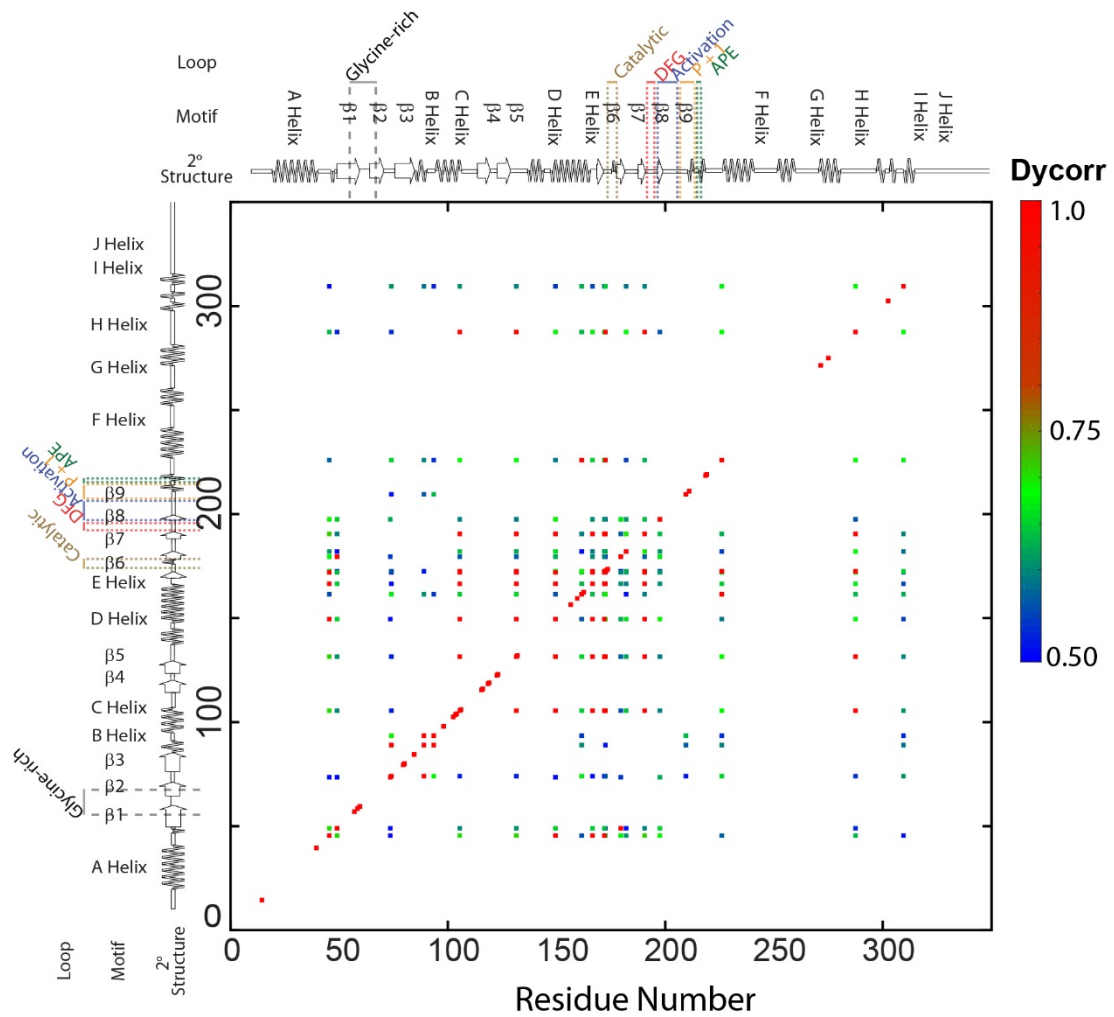

**Supplementary Figure 19:** Dynamic Correlation maps for the binary state of Y204A/ATP $\gamma$ N showing sparse correlations between the methyl groups, indicating a poorly coordinated response of the mutant enzyme to nucleotide binding compared to WT.

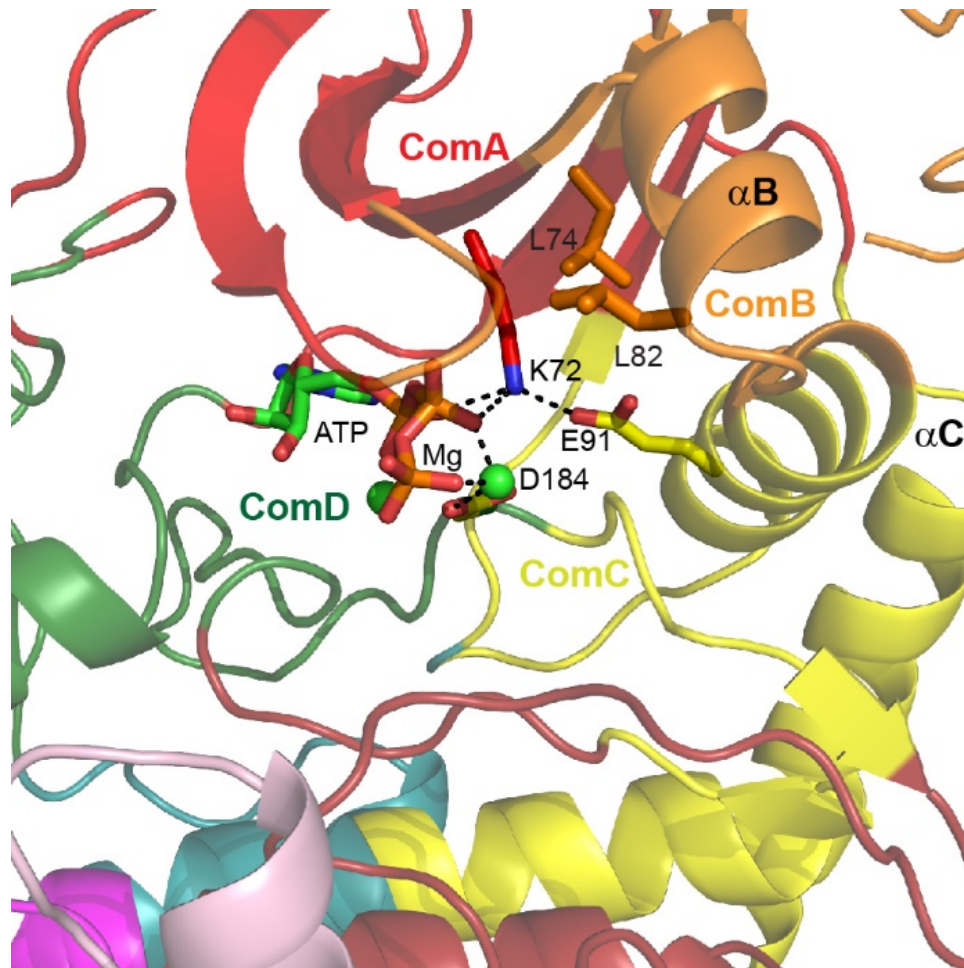

**Supplementary Figure 20.** The community map analysis of ATP/2Mg shows that extensive electrostatic networks around the Mg and  $\gamma$ -phosphate stabilize the key salt bridge between K72-E91, and that of D184, and bring together the communities of A, B, C and D. The methyl groups of L74 and L82 are probes reflecting the local protein motions in the NMR experiment.

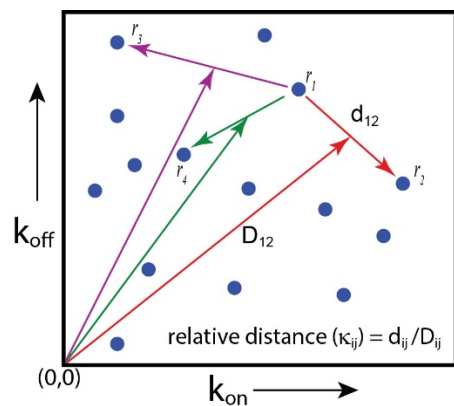

**Supplementary Figure 21.** Graphical representation of  $k_{on}$  and  $k_{off}$  in DyCorr. DyCorr is evaluated by calculating the relative distance between the values in the two dimensional space along  $k_{on}$  and  $k_{off}$ . Every residue which shows chemical exchange is represented by a dot in the  $k_{on}/k_{off}$  space.

**Supplementary Table 1:** PCA and standard deviation of the distribution of states for each of states long the catalytic cycle analyzed by CONCISE analysis.

|                                                            | PC 1          | Standard Deviation |
|------------------------------------------------------------|---------------|--------------------|
| <b><i>Apo</i></b>                                          | -1.26 ± 0.09* | 0.51 ± 0.04        |
| <b><i>ATP<math>\gamma</math>N(low Mg<sup>2+</sup>)</i></b> | -0.58 ± 0.13  | 0.43 ± 0.03        |
| <b><i>ATP<math>\gamma</math>N /PLN<sub>1-19</sub></i></b>  | 0.57 ± 0.12   | 0.73 ± 0.07        |
| <b><i>ATP<math>\gamma</math>N /PKI<sub>5-24</sub></i></b>  | 0.96 ± 0.13   | 0.52 ± 0.06        |
| <b><i>ADP</i></b>                                          | -0.02**       | 0.72               |
| <b><i>ADP /pPKS<sub>5-24</sub></i></b>                     | 0.74          | 0.39               |
| <b><i>ATP<math>\gamma</math>N /PKS<sub>5-24</sub></i></b>  | 0.67          | 0.42               |

\*For the ATP $\gamma$ N (low Mg), ATP $\gamma$ N/PLN<sub>1-19</sub> and ATP $\gamma$ N/PKI<sub>5-24</sub> states the average and variance between each fit is reported (n=4), and the averages serve as references.

\*\* For the ADP, ADP/pPKS<sub>5-24</sub>, ATP $\gamma$ N/PKS<sub>5-24</sub> states, a single fit against the above references is reported.

**Supplementary Table 2.** Entropic changes (cal/K·mol) with respect to apo PKA-C determined from ITC, MD, and NMR data.

|                             | <b>ITC</b>         | <b>NMR</b>                                                        |                                                                        | <b>MD</b>                   |
|-----------------------------|--------------------|-------------------------------------------------------------------|------------------------------------------------------------------------|-----------------------------|
|                             | $\Delta S_{total}$ | $\Delta S_{conf}^{protein}$<br>(model-free analysis) <sup>a</sup> | $\Delta S_{conf}^{protein}$<br>(model-dependent analysis) <sup>b</sup> | $\Delta S_{conf}^{protein}$ |
| <b>ATP<sub>γ</sub>N</b>     | 10.3±0.7           | -29±10                                                            | -36±5                                                                  | -32±2                       |
| <b>ATP<sub>γ</sub>N/PKS</b> | -28±2              | -14±8                                                             | -17±3                                                                  | -25±1                       |
| <b>ADP/pPKS</b>             | -8.0±0.7           | -20±9                                                             | -24±3                                                                  | -32±2                       |
| <b>ADP</b>                  | 5.0±0.7            | -25±9                                                             | -31±4                                                                  | NA                          |

<sup>a</sup> In the model-free analysis(1), conformational entropy is determined as the difference of the order parameters of the methyl groups between the two states:

$$\Delta S_{conf,a \rightarrow b}^{protein} = s_d N_{\chi}^{prot} \Delta[\langle O_b^2 \rangle - \langle O_a^2 \rangle],$$

with the coefficient  $s_d$  equal to  $-1.8 \text{ cal}/(\text{mol} \cdot \text{K})$  and  $N_{\chi}^{prot}$  representing the total number of torsional angles for methyl-bearing residues.

<sup>b</sup> In the model-dependent analysis(2), conformational entropy is determined via the following equation:

$$\Delta S_{conf,a \rightarrow b}^{protein} = -k_B \sum_i \ln \left\{ \frac{3 - (1 + 8O_{b,i})^{1/2}}{3 - (1 + 8O_{a,i})^{1/2}} \right\}$$



**Supplementary Table 3.** Linear methyl side chain resonances reporting on the open to closed transition as identified by CONCISE.

**ADP**

|                   |                   |                   |                   |                   |                   |                   |                   |
|-------------------|-------------------|-------------------|-------------------|-------------------|-------------------|-------------------|-------------------|
| L27-C $\delta$ 1  | L40-C $\delta$ 2  | I46-C $\delta$ 1  | V60-C $\gamma$ 1  | L74-C $\delta$ 1  | V80-C $\gamma$ 1  | L82-C $\delta$ 2  | I85-C $\delta$ 1  |
| L89-C $\delta$ 2  | I94-C $\delta$ 1  | V98-C $\gamma$ 2  | L103-C $\delta$ 1 | L106-C $\delta$ 1 | L116-C $\delta$ 2 | V119-C $\gamma$ 1 | L132-C $\delta$ 1 |
| I135-C $\delta$ 1 | I150-C $\delta$ 1 | L157-C $\delta$ 1 | L160-C $\delta$ 2 | L162-C $\delta$ 1 | L162-C $\delta$ 2 | L167-C $\delta$ 1 | L172-C $\delta$ 2 |
| I180-C $\delta$ 1 | V182-C $\gamma$ 2 | V191-C $\gamma$ 1 | V191-C $\gamma$ 2 | L205-C $\delta$ 1 | I209-C $\delta$ 1 | I210-C $\delta$ 1 | L227-C $\delta$ 2 |
| I244-C $\delta$ 1 | V251-C $\gamma$ 1 | V251-C $\gamma$ 2 | L265-C $\delta$ 1 | L269-C $\delta$ 2 | L272-C $\delta$ 2 | L273-C $\delta$ 2 | V275-C $\gamma$ 2 |
| L277-C $\delta$ 1 | L284-C $\delta$ 1 | V288-C $\gamma$ 1 | V288-C $\gamma$ 2 | I291-C $\delta$ 1 | I305-C $\delta$ 1 | I315-C $\delta$ 1 | I335-C $\delta$ 1 |
| V337-C $\gamma$ 1 |                   |                   |                   |                   |                   |                   |                   |

**ATP $\gamma$ N/High Mg $^{2+}$**

|                   |                   |                   |                   |                   |                   |                   |                   |
|-------------------|-------------------|-------------------|-------------------|-------------------|-------------------|-------------------|-------------------|
| L27-C $\delta$ 1  | L40-C $\delta$ 2  | I46-C $\delta$ 1  | V60-C $\gamma$ 1  | L74-C $\delta$ 1  | V80-C $\gamma$ 1  | L82-C $\delta$ 2  | I85-C $\delta$ 1  |
| L89-C $\delta$ 2  | I94-C $\delta$ 1  | V98-C $\gamma$ 2  | L103-C $\delta$ 1 | L106-C $\delta$ 1 | L116-C $\delta$ 2 | V119-C $\gamma$ 1 | L132-C $\delta$ 1 |
| L132-C $\delta$ 2 | I135-C $\delta$ 1 | I150-C $\delta$ 1 | L157-C $\delta$ 1 | L160-C $\delta$ 1 | L162-C $\delta$ 1 | L162-C $\delta$ 2 | L167-C $\delta$ 2 |
| L172-C $\delta$ 2 | I180-C $\delta$ 1 | V182-C $\gamma$ 1 | V191-C $\gamma$ 1 | V191-C $\gamma$ 2 | L205-C $\delta$ 1 | I209-C $\delta$ 1 | I210-C $\delta$ 1 |
| L227-C $\delta$ 2 | I244-C $\delta$ 1 | V251-C $\gamma$ 2 | L269-C $\delta$ 2 | L272-C $\delta$ 2 | L273-C $\delta$ 1 | L273-C $\delta$ 2 | V275-C $\gamma$ 2 |

|          |          |          |          |          |          |          |          |
|----------|----------|----------|----------|----------|----------|----------|----------|
| L277-Cδ1 | L284-Cδ1 | V288-Cγ1 | V288-Cγ2 | I291-Cδ1 | I305-Cδ1 | I315-Cδ1 | I335-Cδ1 |
| V337-Cγ1 |          |          |          |          |          |          |          |

**ADP/pPKS<sub>5-24</sub>**

|          |          |          |          |          |          |          |          |
|----------|----------|----------|----------|----------|----------|----------|----------|
| L40-Cδ2  | I46-Cδ1  | V60-Cγ1  | L74-Cδ1  | V80-Cγ1  | L82-Cδ1  | I85-Cδ1  | L89-Cδ2  |
| I94-Cδ1  | V98-Cγ2  | L103-Cδ1 | L106-Cδ1 | V119-Cγ1 | L116-Cδ2 | L132-Cδ1 | L132-Cδ2 |
| I135-Cδ1 | I150-Cδ1 | L157-Cδ1 | L160-Cδ1 | L162-Cδ1 | L167-Cδ1 | L167-Cδ2 | L172-Cδ2 |
| I180-Cδ1 | V182-Cγ2 | V191-Cγ1 | V191-Cγ2 | I209-Cδ1 | I210-Cδ1 | L227-Cδ2 | I244-Cδ1 |
| V251-Cγ1 | V251-Cγ2 | L265-Cδ1 | L269-Cδ2 | L272-Cδ2 | L273-Cδ2 | V275-Cγ2 | L277-Cδ1 |
| L284-Cδ1 | V288-Cγ1 | V288-Cγ2 | I291-Cδ1 | I305-Cδ1 | I315-Cδ1 | I335-Cδ1 | V337-Cγ1 |

**ATP<sub>γ</sub>N/PKS<sub>5-24</sub>**

|          |          |          |          |          |          |          |          |
|----------|----------|----------|----------|----------|----------|----------|----------|
| L27-Cδ1  | I46-Cδ1  | V60-Cγ1  | L74-Cδ1  | V80-Cγ1  | L82-Cδ1  | I85-Cδ1  | L89-Cδ2  |
| I94-Cδ1  | V98-Cγ2  | L103-Cδ1 | L106-Cδ1 | L116-Cδ2 | V119-Cγ1 | L132-Cδ1 | L132-Cδ2 |
| I135-Cδ1 | I150-Cδ1 | L157-Cδ1 | L160-Cδ1 | L162-Cδ1 | L162-Cδ2 | L167-Cδ1 | L167-Cδ2 |
| L172-Cδ2 | I180-Cδ1 | V182-Cγ2 | V191-Cγ1 | V191-Cγ2 | I209-Cδ1 | I210-Cδ1 | L227-Cδ2 |
| I244-Cδ1 | V251-Cγ1 | V251-Cγ2 | L265-Cδ1 | L269-Cδ2 | L272-Cδ2 | L273-Cδ2 | V275-Cγ2 |
| L277-Cδ1 | L284-Cδ1 | V288-Cγ1 | V288-Cγ2 | I291-Cδ1 | I305-Cδ1 | I315-Cδ1 | I335-Cδ1 |
| V337-Cγ1 |          |          |          |          |          |          |          |

**Supplementary Table 4.** Single quantum individual site fits of CPMG curves at 700 MHz and 850 MHz of the ATP<sub>γ</sub>N bound state of PKA-C.

| ATP <sub>γ</sub> N | R <sub>ex</sub> (700 MHz, s <sup>-1</sup> ) | R <sub>ex</sub> (850 MHz, s <sup>-1</sup> ) | Δω (ppm)  | p <sub>A</sub> (%) | k <sub>ex</sub> (s <sup>-1</sup> ) |
|--------------------|---------------------------------------------|---------------------------------------------|-----------|--------------------|------------------------------------|
| L40-Cδ1            | 13.3 ± 0.6                                  | 19.8 ± 1.0                                  | 0.2 ± 0.1 | 50.0 ± 16.4        | 810 ± 88                           |
| I46-Cδ1            | 18.0 ± 0.6                                  | 26.7 ± 1.2                                  | 0.4 ± 0.2 | 65.6 ± 18.2        | 2087 ± 280                         |
| L49-Cδ2            | 21.5 ± 13.3                                 | 31.8 ± 19.6                                 | 0.5 ± 1.5 | 61.5 ± 21.9        | 4032 ± 3867                        |
| L59-Cδ1            | 8.7 ± 0.9                                   | 12.8 ± 1.3                                  | 0.3 ± 0.4 | 64.7 ± 20.7        | 2116 ± 554                         |
| I73-Cδ1            | 3.2 ± 10.2                                  | 4.8 ± 11.1                                  | 0.1 ± 0.4 | 50.0 ± 20.2        | 269 ± 329                          |
| L74-Cδ1            | 19.7 ± 1.6                                  | 29.2 ± 2.9                                  | 0.4 ± 0.4 | 65.6 ± 20.0        | 2635 ± 768                         |
| V79-Cγ2            | 2.4 ± 0.3                                   | 2.4 ± 0.3                                   | 3.0 ± 0.4 | 97.6 ± 2.2         | 100 ± 542                          |
| V80-Cγ1            | 7.2 ± 1.2                                   | 7.2 ± 1.2                                   | 4.9 ± 0.2 | 75.8 ± 6.2         | 24 ± 53                            |
| L82-Cδ1            | 2.5 ± 0.6                                   | 3.7 ± 1.0                                   | 0.2 ± 0.7 | 85.2 ± 19.6        | 1683 ± 1652                        |
| I85-Cδ1            | 5.6 ± 0.3                                   | 5.7 ± 0.4                                   | 1.2 ± 0.1 | 94.2 ± 4.5         | 96 ± 183                           |
| L89-Cδ2            | 7.7 ± 0.5                                   | 11.3 ± 0.8                                  | 0.2 ± 0.3 | 68.9 ± 20.5        | 1918 ± 314                         |
| I94-Cδ1            | 9.5 ± 0.4                                   | 13.8 ± 0.6                                  | 0.4 ± 0.2 | 90.2 ± 19.0        | 1894 ± 294                         |
| L95-Cδ1            | 45.4 ± 3.7                                  | 54.0 ± 9.8                                  | 1.5 ± 0.4 | 94.8 ± 12.1        | 1654 ± 824                         |
| V98-Cγ2            | 6.9 ± 4.2                                   | 10.2 ± 5.6                                  | 0.3 ± 1.4 | 50.0 ± 21.2        | 4087 ± 2811                        |
| L103-Cδ1           | 5.9 ± 0.9                                   | 7.8 ± 1.8                                   | 1.3 ± 0.7 | 99.0 ± 20.1        | 2433 ± 1260                        |
| V104-Cγ2           | 2.0 ± 1.8                                   | 2.9 ± 2.2                                   | 0.2 ± 1.8 | 50.0 ± 22.1        | 3896 ± 3371                        |
| L106-Cδ1           | 11.2 ± 0.5                                  | 16.6 ± 0.8                                  | 0.3 ± 0.3 | 73.3 ± 20.1        | 2296 ± 313                         |
| L116-Cδ1           | 4.1 ± 3.1                                   | 6.1 ± 3.8                                   | 0.1 ± 0.3 | 50.0 ± 20.7        | 530 ± 376                          |
| L116-Cδ2           | 5.3 ± 2.9                                   | 7.9 ± 3.9                                   | 0.3 ± 1.2 | 81.3 ± 21.1        | 3043 ± 2181                        |
| V119-Cγ1           | 5.4 ± 0.4                                   | 6.7 ± 0.9                                   | 0.8 ± 0.3 | 98.7 ± 11.7        | 997 ± 458                          |
| V119-Cγ2           | 2.0 ± 1.2                                   | 2.2 ± 1.5                                   | 1.7 ± 1.1 | 99.8 ± 12.0        | 1151 ± 2349                        |
| V123-Cγ2           | 9.1 ± 2.3                                   | 13.5 ± 3.1                                  | 0.3 ± 0.6 | 54.2 ± 19.6        | 3254 ± 1271                        |
| L132-Cδ1           | 28.1 ± 1.2                                  | 41.6 ± 2.6                                  | 0.5 ± 0.3 | 50.4 ± 19.1        | 2549 ± 394                         |
| L132-Cδ2           | 8.2 ± 3.2                                   | 8.8 ± 5.8                                   | 0.4 ± 0.2 | 94.9 ± 15.6        | 201 ± 162                          |

|          |            |             |           |             |             |
|----------|------------|-------------|-----------|-------------|-------------|
| I135-Cδ1 | 3.1 ± 1.2  | 4.1 ± 1.7   | 1.2 ± 1.0 | 99.5 ± 14.9 | 2052 ± 1540 |
| I150-Cδ1 | 34.2 ± 1.5 | 46.6 ± 3.9  | 1.0 ± 0.3 | 92.6 ± 15.2 | 2181 ± 427  |
| L157-Cδ1 | 9.1 ± 0.6  | 13.5 ± 1.1  | 0.2 ± 0.2 | 68.9 ± 20.4 | 1325 ± 256  |
| L160-Cδ1 | 4.5 ± 0.6  | 6.6 ± 1     | 0.2 ± 0.4 | 71.4 ± 20.0 | 2266 ± 1135 |
| L160-Cδ2 | 7.4 ± 0.5  | 9.7 ± 0.8   | 1.3 ± 0.4 | 98.8 ± 11.3 | 2353 ± 654  |
| L162-Cδ1 | 36.0 ± 3.4 | 53.8 ± 6.9  | 0.4 ± 0.3 | 56.4 ± 19.3 | 1557 ± 586  |
| L162-Cδ2 | 8.7 ± 0.7  | 12.8 ± 1.1  | 0.3 ± 0.4 | 64.7 ± 20.1 | 2116 ± 519  |
| I163-Cδ1 | 11.9 ± 1.9 | 17.8 ± 3.3  | 0.1 ± 0.1 | 50.0 ± 16.9 | 422 ± 72    |
| L167-Cδ1 | 2.5 ± 3.2  | 3.7 ± 3.6   | 0.2 ± 2.1 | 74.2 ± 22.6 | 3254 ± 3974 |
| L172-Cδ2 | 24.2 ± 0.7 | 35.8 ± 1.2  | 0.5 ± 0.2 | 66.5 ± 18.3 | 2685 ± 272  |
| L173-Cδ1 | 19.0 ± 0.9 | 28.1 ± 2.2  | 0.4 ± 0.3 | 58.8 ± 19.8 | 2565 ± 466  |
| L173-Cδ2 | 3.3 ± 2.1  | 3.3 ± 2.8   | 1.2 ± 0.9 | 88.3 ± 14.7 | 25 ± 2720   |
| I174-Cδ1 | 34.9 ± 1.5 | 43.4 ± 2.9  | 0.7 ± 0.1 | 90.8 ± 9.9  | 863 ± 223   |
| I180-Cδ1 | 59.8 ± 4.7 | 85.7 ± 12.9 | 1.0 ± 0.5 | 83.8 ± 19.7 | 2805 ± 1032 |
| V182-Cγ2 | 12.5 ± 0.5 | 18.5 ± 0.8  | 0.3 ± 0.2 | 61.2 ± 19.3 | 2493 ± 282  |
| V191-Cγ1 | 5.4 ± 0.2  | 8.0 ± 0.2   | 0.2 ± 0.2 | 65.7 ± 19.6 | 2703 ± 225  |
| L198-Cδ1 | 45.4 ± 3.7 | 54.0 ± 8.9  | 1.5 ± 0.4 | 94.8 ± 11.6 | 1654 ± 722  |
| L205-Cδ1 | 12.4 ± 4.4 | 16.7 ± 5.5  | 3.9 ± 2.0 | 99.3 ± 12.2 | 8445 ± 2915 |
| V226-Cγ2 | 2.6 ± 1.1  | 2.8 ± 1.5   | 2.2 ± 0.9 | 99.8 ± 6.0  | 1428 ± 1653 |
| L227-Cδ2 | 11.0 ± 6.7 | 11.9 ± 6.7  | 6.6 ± 1.5 | 99.6 ± 1.4  | 4144 ± 2105 |
| I246-Cδ1 | 3.4 ± 2.3  | 5.0 ± 3.4   | 0.2 ± 0.8 | 50.0 ± 19.9 | 4889 ± 4676 |
| V255-Cγ2 | 2.3 ± 1.9  | 2.4 ± 2.0   | 5.0 ± 1.4 | 99.9 ± 0.9  | 2409 ± 1913 |
| V288-Cγ1 | 2.3 ± 0.1  | 3.4 ± 0.2   | 0.1 ± 0.2 | 50.0 ± 20.6 | 1182 ± 224  |
| I303-Cδ1 | 3.0 ± 0.6  | 3.0 ± 0.7   | 1.9 ± 0.4 | 93.6 ± 6.4  | 46 ± 743    |
| V310-Cγ1 | 9.0 ± 0.3  | 10.9 ± 0.5  | 0.7 ± 0.1 | 97.6 ± 0.5  | 794 ± 151   |
| I315-Cδ1 | 2.6 ± 1.2  | 3.8 ± 2.0   | 0.1 ± 0.5 | 77.6 ± 20.4 | 1275 ± 2589 |
| I335-Cδ1 | 50.1 ± 3.2 | 64.4 ± 7.3  | 1.6 ± 0.4 | 94.1 ± 15.6 | 2469 ± 969  |

**Supplementary Table 5:** Single quantum individual site fits of CPMG curves at 700 MHz and 850 MHz of the ADP/ pPKS<sub>5-24</sub> bound state of PKA-C.

| ADP/pPKS <sub>5-24</sub> | R <sub>ex</sub> (700 MHz, s <sup>-1</sup> ) | R <sub>ex</sub> (850 MHz, s <sup>-1</sup> ) | Δω (ppm)   | p <sub>A</sub> (%) | k <sub>ex</sub> (s <sup>-1</sup> ) |
|--------------------------|---------------------------------------------|---------------------------------------------|------------|--------------------|------------------------------------|
| L46-Cδ1                  | 2.5 ± 3                                     | 3.7 ± 3.3                                   | 0.07±0.58  | 50.0± 19.6         | 590 ± 590                          |
| L49-Cδ2                  | 12.3 ± 1.5                                  | 13.0± 2.5                                   | 0.58± 0.18 | 94.7± 14.6         | 280 ± 210                          |
| L73-Cδ1                  | 2.0 ± 1.2                                   | 2.1 ± 1.6                                   | 1.87± 1.00 | 99.8± 8.7          | 990 ± 2460                         |
| V80-Cγ1                  | 17.0 ± 1.5                                  | 19.0 ± 3.4                                  | 0.91± 0.33 | 96.4± 16.7         | 690± 600                           |
| V80-Cγ2                  | 3.5 ± 0.7                                   | 10.6 ± 4.4                                  | 1.50± 0.86 | 98.4± 16           | 64± 250                            |
| I85-Cδ1                  | 3.8 ± 0.3                                   | 3.6 ± 0.3                                   | 1.20± 0.11 | 82.6± 3.9          | 17± 7.5                            |
| I94-Cδ1                  | 9.4 ± 0.6                                   | 10.7 ± 3.0                                  | 0.13± 0.10 | 50.0± 19.6         | 730± 100                           |
| L106-Cδ2                 | 7.5 ± 2.3                                   | 7.6 ± 4.0                                   | 0.52± 0.19 | 81.9± 14.0         | 38± 130                            |
| V123-Cγ1                 | 5.1 ± 1.0                                   | 5.5 ± 1.7                                   | 0.65± 0.37 | 98.3± 18.3         | 380± 440                           |
| I150-Cδ1                 | 10.2 ± 0.8                                  | 15.1 ± 1.4                                  | 0.32± 0.39 | 71.0± 20.0         | 2170± 620                          |
| I174-Cδ1                 | 7.0 ± 0.5                                   | 10.1 ± 0.9                                  | 0.51± 0.42 | 94.5± 20.5         | 2200± 660                          |
| I180-Cδ1                 | 7.7 ± 0.6                                   | 11.4 ± 1.0                                  | 0.25± 0.33 | 70.3± 20.0         | 2080± 480                          |
| L198-Cδ1                 | 17.5 ± 1.1                                  | 22.3 ± 2.7                                  | 0.37± 0.09 | 91.1± 12.2         | 520±110                            |
| L198-Cδ2                 | 4.1 ± 0.7                                   | 6.1 ± 1.3                                   | 0.11± 0.14 | 50.0 ± 21.5        | 980± 370                           |
| I246-Cδ1                 | 6.3 ± 4.8                                   | 8.8 ± 6.2                                   | 1.15± 1.29 | 98.5± 22.2         | 3160± 3410                         |
| I303-Cδ1                 | 8.6 ± 0.4                                   | 12.7 ± 5.1                                  | 0.38± 0.59 | 50.0± 20.3         | 5160± 2760                         |
| I305-Cδ1                 | 2.2 ± 1.9                                   | 3.2 ± 2.4                                   | 0.87± 1.44 | 99.2± 18.8         | 3070± 3330                         |

**Supplementary Table 6:** Single quantum individual site fits of CPMG curves at 700 MHz and 850 MHz of the ADP bound state of PKA-C.

| ADP               | $R_{ex}$ (700 MHz, $s^{-1}$ ) | $R_{ex}$ (850 MHz, $s^{-1}$ ) | $\Delta\omega$ (ppm) | $p_A$ (%)       | $k_{ex}$ ( $s^{-1}$ ) |
|-------------------|-------------------------------|-------------------------------|----------------------|-----------------|-----------------------|
| L40-C $\delta$ 1  | 11.1 $\pm$ 0.6                | 16.4 $\pm$ 0.9                | 0.30 $\pm$ 0.24      | 50.0 $\pm$ 18.2 | 2400 $\pm$ 350        |
| I46-C $\delta$ 1  | 4.1 $\pm$ 2.8                 | 6.0 $\pm$ 3.5                 | 0.82 $\pm$ 1.41      | 97.8 $\pm$ 17.7 | 3900 $\pm$ 2400       |
| V80-C $\gamma$ 1  | 5.5 $\pm$ 2.6                 | 6.2 $\pm$ 3.4                 | 2.14 $\pm$ 0.90      | 99.5 $\pm$ 5.0  | 1700 $\pm$ 2000       |
| V80-C $\gamma$ 2  | 3.2 $\pm$ 0.2                 | 4.7 $\pm$ 0.5                 | 0.09 $\pm$ 0.16      | 50.0 $\pm$ 22   | 780 $\pm$ 160         |
| I85-C $\delta$ 1  | 3.8 $\pm$ 0.3                 | 3.6 $\pm$ 0.3                 | 1.20 $\pm$ 0.11      | 99.5 $\pm$ 10.8 | 1500 $\pm$ 71900      |
| L89-C $\delta$ 2  | 4.9 $\pm$ 0.4                 | 5.5 $\pm$ 0.9                 | 1.16 $\pm$ 0.29      | 99.1 $\pm$ 7.5  | 830 $\pm$ 620         |
| I94-C $\delta$ 1  | 3.9 $\pm$ 0.4                 | 5.7 $\pm$ 0.6                 | 0.29 $\pm$ 0.51      | 89.1 $\pm$ 20.5 | 2600 $\pm$ 750        |
| V104-C $\gamma$ 2 | 4.2 $\pm$ 3.7                 | 4.8 $\pm$ 4.3                 | 2.43 $\pm$ 1.52      | 99.7 $\pm$ 12.8 | 2200 $\pm$ 3300       |
| L106-C $\delta$ 1 | 4.1 $\pm$ 3.0                 | 4.9 $\pm$ 3.7                 | 1.51 $\pm$ 1.25      | 99.5 $\pm$ 10.5 | 1600 $\pm$ 2200       |
| L116-C $\delta$ 2 | 6.6 $\pm$ 3.7                 | 9.5 $\pm$ 5.3                 | 0.76 $\pm$ 0.96      | 96.4 $\pm$ 21.3 | 3500 $\pm$ 3300       |
| L132-C $\delta$ 1 | 13.7 $\pm$ 1.1                | 15.6 $\pm$ 2.4                | 0.89 $\pm$ 0.23      | 97.1 $\pm$ 8.5  | 730 $\pm$ 370         |
| L173-C $\delta$ 1 | 11.3 $\pm$ 6.6                | 14.3 $\pm$ 9.4                | 1.9 $\pm$ 1.20       | 98.9 $\pm$ 17.1 | 2800 $\pm$ 3600       |
| I180-C $\delta$ 1 | 34.4 $\pm$ 2.2                | 43.9 $\pm$ 6.1                | 0.9 $\pm$ 0.27       | 93.3 $\pm$ 11.7 | 1400 $\pm$ 460        |
| V182-C $\gamma$ 2 | 6.3 $\pm$ 0.7                 | 8.3 $\pm$ 1.4                 | 0.80 $\pm$ 0.42      | 98.4 $\pm$ 19   | 1400 $\pm$ 630        |
| V191-C $\gamma$ 1 | 2.5 $\pm$ 0.2                 | 2.6 $\pm$ 0.3                 | 1.03 $\pm$ 0.28      | 99.4 $\pm$ 10.7 | 490 $\pm$ 440         |
| L198-C $\delta$ 1 | 20.2 $\pm$ 1.2                | 23.7 $\pm$ 2.6                | 0.99 $\pm$ 0.28      | 96.3 $\pm$ 6.8  | 970 $\pm$ 400         |
| L205-C $\delta$ 1 | 14.3 $\pm$ 4.5                | 21.1 $\pm$ 6.9                | 0.47 $\pm$ 0.53      | 62 $\pm$ 20     | 4400 $\pm$ 2200       |
| V226-C $\gamma$ 2 | 7.3 $\pm$ 1.7                 | 7.3 $\pm$ 3.1                 | 0.59 $\pm$ 0.27      | 93.5 $\pm$ 16.3 | 110 $\pm$ 240         |
| V310-C $\gamma$ 1 | 10.7 $\pm$ 0.3                | 13.6 $\pm$ 0.6                | 0.92 $\pm$ 0.15      | 97.7 $\pm$ 2.3  | 1400 $\pm$ 250        |
| I335-C $\delta$ 1 | 10.7 $\pm$ 0.7                | 15.7 $\pm$ 1.3                | 0.36 $\pm$ 0.34      | 80.3 $\pm$ 20   | 2200 $\pm$ 510        |

### Supplementary References

1. Kasinath V, Sharp KA, & Wand AJ (2013) Microscopic insights into the NMR relaxation-based protein conformational entropy meter. *J Am Chem Soc* 135(40):15092-15100.
2. Yang D & Kay LE (1996) Contributions to Conformational Entropy Arising from Bond Vector Fluctuations Measured from NMR-Derived Order Parameters: Application to Protein Folding. *Journal of Molecular Biology* 263(2):369-382.
