# Supplementary material for: Globally correlated conformational entropy underlies positive and negative cooperativity in a kinase’s enzymatic cycle
Source: PubMed Central journal article supplement (PMC6379427; doi:10.1038/s41467-019-08655-7), 2019-02-18
Supplement: 41467_2019_8655_MOESM3_ESM.pdf [file 41467_2019_8655_MOESM3_ESM.pdf]

## **Description of Additional Supplementary Files**

File Name: Supplementary Data 1

Description: Methyl order parameter values

File Name: Supplementary Data 2

Description: CHESCA map values

File Name: Supplementary Data 3

Description: DyCorr values
